## **Systematic Epigenome Editing Captures the Context-dependent Instructive Function of Chromatin Modifications**

Cristina Policarpi<sup>1</sup>, Marzia Munafò<sup>1</sup>, Stylianos Tsagkris<sup>1</sup>, Valentina Carlini<sup>1,2</sup> & Jamie A. Hackett<sup>1,3,\*</sup>

<sup>1</sup> European Molecular Biology Laboratory (EMBL), Epigenetics & Neurobiology Unit, Rome, Italy.

<sup>2</sup> Collaboration for Joint PhD Degree between EMBL and Heidelberg University, Faculty of Biosciences, Heidelberg, Germany

<sup>3</sup> joint appointment with Genome Biology Unit, EMBL, Heidelberg, Germany

\*Corresponding author: [jamie.hackett@embl.it](mailto:jamie.hackett@embl.it)

Keywords: epigenetic editing; polycomb; transcription; eQTL; histone modification; H3K4me3

## ABSTRACT

Chromatin modifications are linked with regulating patterns of gene expression, but their causal role and context-dependent impact on transcription remains unresolved. Here, we develop a modular epigenome editing platform that programmes nine key chromatin modifications – or combinations thereof – to precise loci in living cells. We couple this with single-cell readouts to systematically quantitate the magnitude and heterogeneity of transcriptional responses elicited by each specific chromatin modification. Amongst these, we show installing H3K4me3 at promoters causally instructs transcription activation by hierarchically remodeling the chromatin landscape. We further dissect how DNA sequence motifs influence the transcriptional impact of chromatin marks, identifying switch-like and attenuative effects within distinct *cis* contexts. Finally, we examine the interplay of combinatorial modifications, revealing co-targeted H3K27me3 and H2AK119ub maximise silencing penetrance across single-cells. Our precision perturbation strategy unveils the causal principles of how chromatin modification(s) influence transcription, and dissects how quantitative responses are calibrated by contextual interactions.

## 1 INTRODUCTION

2 Understanding the molecular basis of gene regulation is a central challenge in modern biology.  
3 Regulation of eukaryotic transcription is guided by a complex interplay between transcription factors  
4 (TF), *cis* regulatory elements, and epigenetic mechanisms. The latter includes chromatin-based systems,  
5 and most prominently post-translational histone and DNA modifications. Such ‘chromatin  
6 modifications’ influence transcription activity via directly altering chromatin compaction, by acting as  
7 specific docking sites for ‘reader’ proteins, and/or by influencing transcription factor (TF) access to  
8 cognate motifs<sup>1-3</sup>. As a result, chromatin marks are thought to play a central regulatory role in deploying  
9 and propagating gene expression programs during development, whilst conversely, aberrant chromatin  
10 profiles are linked with gene mis-expression and pathology<sup>4-6</sup>.

11  
12 The prominent role of chromatin modifications in genome regulation has spurred major initiatives to  
13 map their genome-wide distribution across healthy and disease cell types, revealing correlations with  
14 genomic features and transcription activity<sup>7-11</sup>. For example, histone H3 lysine 4 trimethylation  
15 (H3K4me3) is enriched at active gene promoters, H3K9me2/3 and H3K27me3/H2AK119ub are  
16 correlated with transcriptional repression, whilst active enhancers are co-marked by H3K4me1 and  
17 H3K27ac. However, whether the observed correlations indicate causation remains unclear. Indeed,  
18 depleting H3K4me1 or H3K27ac from embryonic stem cell (ESC) enhancers has only a relatively minor  
19 impact<sup>12,13</sup>. Moreover, the genomic landscape of activating histone modifications can be predicted and  
20 modulated by nascent transcription, implying marks such as H3K4me3 primarily reflect a consequence  
21 of gene expression<sup>14,15</sup>. To directly interrogate the functional relevance of epigenetic marks,  
22 perturbation strategies have been widely deployed, often by manipulating chromatin-modifying  
23 enzymes or histone residues<sup>5,16,17</sup>. However, whilst insightful, such global approaches affect the entire  
24 (epi)genome simultaneously, and thus render it challenging to distinguish *direct* from *indirect* effects.  
25 Indeed, chromatin-modifying enzymes also have multiple non-histone substrates<sup>18,19</sup> and non-catalytic  
26 roles<sup>20,21</sup>, whilst residues typically acquire multiple modifications, which all complicates interpretation  
27 of their loss-of-function. Thus, the extent to which chromatin modifications *per se* causally instruct  
28 gene expression states remains unresolved.

29  
30 A deeper understanding of the functional role of epigenetic modifications on DNA-templated processes  
31 would be facilitated by development of tools for precision chromatin perturbations. Epigenome editing  
32 technologies that enable manipulation of specific chromatin states at target loci have recently emerged,  
33 primarily based around programmable dCas9-fusion systems<sup>22,23</sup>. For example, P300 and HDAC3 have  
34 been fused to dCas9 to deposit or remove histone acetylation<sup>24,25</sup>. Further approaches have engineered  
35 dCas9 systems that specifically edit DNA methylation, H3K27me3, H3K27ac, H3K4me3, and  
36 H3K79me3<sup>26-34</sup>. Such pioneering studies have revealed proof-of-principle that altering the epigenome  
37 can be sufficient to induce at least some changes in gene expression. However, the transcriptional  
38 responses to specific marks are generally modest, if at all, and register at only a restricted set of target  
39 genes. This may partly reflect technical limitations in depositing physiological levels of chromatin  
40 marks, but likely also implies their functional impact varies depending on context-dependent influences.  
41 Indeed, there is increasing appreciation that factors such as underlying DNA motifs/variants and the  
42 cell type-specific repertoire of TF will all modulate the precise impact of a chromatin modification at a  
43 given locus<sup>35,36</sup>. Thus, beyond the principle of causality, it is important to deconvolve the degree to  
44 which specific chromatin marks affect transcription levels *quantitatively* (as opposed to an ON/OFF  
45 toggle), how DNA sequence context influences this, and the hierarchical relationships involved.

46  
47 Here, we develop a suite of modular epigenetic editing tools to systematically programme nine  
48 biologically-important chromatin modifications to specific loci at physiological levels. By coupling this

49 with single-cell readouts, we capture the causal and quantitative impact of each modification on  
50 transcription. We further show that epigenetic marks are linked to each other by specific hierarchical  
51 interplays, and function combinatorially to promote robustness in transcriptional responses. We finally  
52 dissect how the impact of chromatin marks is influenced by sequence motifs and TF binding, identifying  
53 switch-like functionality within different *cis* contexts. The output is a framework for quantifying the  
54 instructive role of chromatin modifications, and their functional interplay with other regulatory  
55 mechanisms.

56

57

58

## 59 RESULTS

60

### 61 A toolkit for precision programming of chromatin modifications at endogenous loci

62 We sought to engineer a modular epigenetic editing system that can programme *de novo* chromatin  
63 modification(s) to specific target loci at physiological levels. To achieve this, we exploited a  
64 catalytically dead *Cas9* (dCas9) fused with a tail-array of five GCN4 motifs (dCas9<sup>GCN4</sup>)<sup>37,38</sup>. This  
65 tethers up to five scFV-tagged epigenetic ‘effectors’ to genomic targets, which amplifies editing activity  
66 (Fig 1A). To programme a broad range of specific chromatin modifications, we built a library of  
67 effectors each comprising the catalytic domain (CD) of a DNA- or histone- modifying enzyme linked  
68 with scFV (collectively: CD<sup>scFv</sup>). By isolating the catalytic domain, we can exclude confounding effects  
69 of tethering entire chromatin-modifying proteins, which can exert non-catalytic regulatory activities.  
70 The toolkit includes catalytic cores that deposit H3K4me3 (*Prdm9*-CD<sup>scFv</sup>), H3K27ac (*p300*-CD<sup>scFv</sup>),  
71 H3K79me2 (*Dot1l*-CD<sup>scFv</sup>), H3K9me2/3 (*G9a*-CD<sup>scFv</sup>), H3K36me3 (*Setd2*-CD<sup>scFv</sup>), DNA methylation  
72 (*Dnmt3a3l*-CD<sup>scFv</sup>), H2AK119ub (*Ring1b*-CD<sup>scFv</sup>) and full-length enzymes that write H3K27me3  
73 (*Ezh2*-FL<sup>scFv</sup>) and H4K20me3 (*Kmt5c*-FL<sup>scFv</sup>) (Fig 1A). As further controls, we generated catalytic  
74 point-mutants for each CD<sup>scFv</sup> effector (mut-CD<sup>scFv</sup>), which specifically abrogates their enzymatic  
75 activity (Fig S1A). Our strategy therefore enables direct assessment of the functional role of the  
76 deposited chromatin mark *per se*.

77

78 We engineered the system to be doxycycline (DOX)-inducible to facilitate dynamic ON-OFF epigenetic  
79 editing. Moreover, all CD<sup>scFv</sup> effectors are tagged with superfolder GFP (sfGFP) to monitor protein  
80 stability, to track dynamics, and to isolate epigenetically edited populations (Fig S1B). Locus-specific  
81 editing is directed by an enhanced gRNA scaffold (AT-flip, extended stem loop) with tagBFP<sup>39</sup>.  
82 Finally, up to three nuclear localisation sequences (NLS) were incorporated into each effector, since we  
83 found two NLS were routinely insufficient for robust nuclear accumulation, for example for *Dot1l*-  
84 CD<sup>scFv</sup> (Fig S1C).

85

86 To test the capacity to programme specific *de novo* epigenetic states, we introduced dCas9<sup>GCN4</sup> and each  
87 CD<sup>scFv</sup> into mouse ESC *via* piggyBac, and targeted the endogenous *Hbby* locus. Following induction  
88 with DOX, we observed that each effector directed highly significant deposition of its cognate histone  
89 modification relative to recruitment of GFP<sup>scFv</sup> alone, using quantitative CUT&RUN-qPCR. This  
90 includes *de novo* establishment of H3K27ac ( $P < 0.0001$ ), H3K4me3 ( $P = 0.011$ ), H3K79me2 ( $P = 0.029$ ),  
91 H4K20me3 ( $P = 0.001$ ), H3K27me3 ( $P = 0.041$ ), H2AK119ub ( $P = 0.0003$ ), H3K36me3 ( $P = 0.001$ ),  
92 H3K9me2/3 ( $P = 0.0002$ ) (Fig 1B). Comparable chromatin mark targeting was independently achieved  
93 using either one or three gRNAs together (Fig S1D). We also found highly significant programming of  
94 DNA methylation ( $P < 0.0001$ ) upon recruitment of *Dnmt3a3L*-CD<sup>scFv</sup> (Fig 1C).

95

96 To determine the quantitative level (amplitude) and spreading (domain breadth) of induced epigenetic  
97 editing, we assessed enrichment across the entire *Hbby* locus. We typically observed a peak of each  
98 programmed histone modification centered on the gRNA binding sites, with significantly modified  
99 domains extending more than 2kb either side, which likely reflects the flexible tail-array structure of  
100 dCas9<sup>GCN4</sup>. Enrichment of targeted histone modifications ranged from 7 to >20-fold over background  
101 (Fig 1D-I) and importantly, in most cases were of comparable quantitative levels to strong positive  
102 peaks within the genome. For example, programmed H3K4me3 enrichment (*Prdm9*-CD<sup>GFP-scFv</sup>) at *Hbby*  
103 was equivalent to highly-marked *Oct4* and *Nanog* promoters (Fig 1D), whilst polycomb marks  
104 H3K27me3 (*Ezh2*-FL<sup>scFv</sup>) and H2AK119ub (*Ring1b*-CD<sup>scFv</sup>) were *de novo* deposited with similar  
105 enrichments as endogenous polycomb targets *Zic4* and *Wnt10a* (Fig 1E-F). Moreover, *de novo*  
106 H3K36me3, H3K79me3, and H4K20me3 were comparable with endogenous peaks, whilst H3K9me2/3

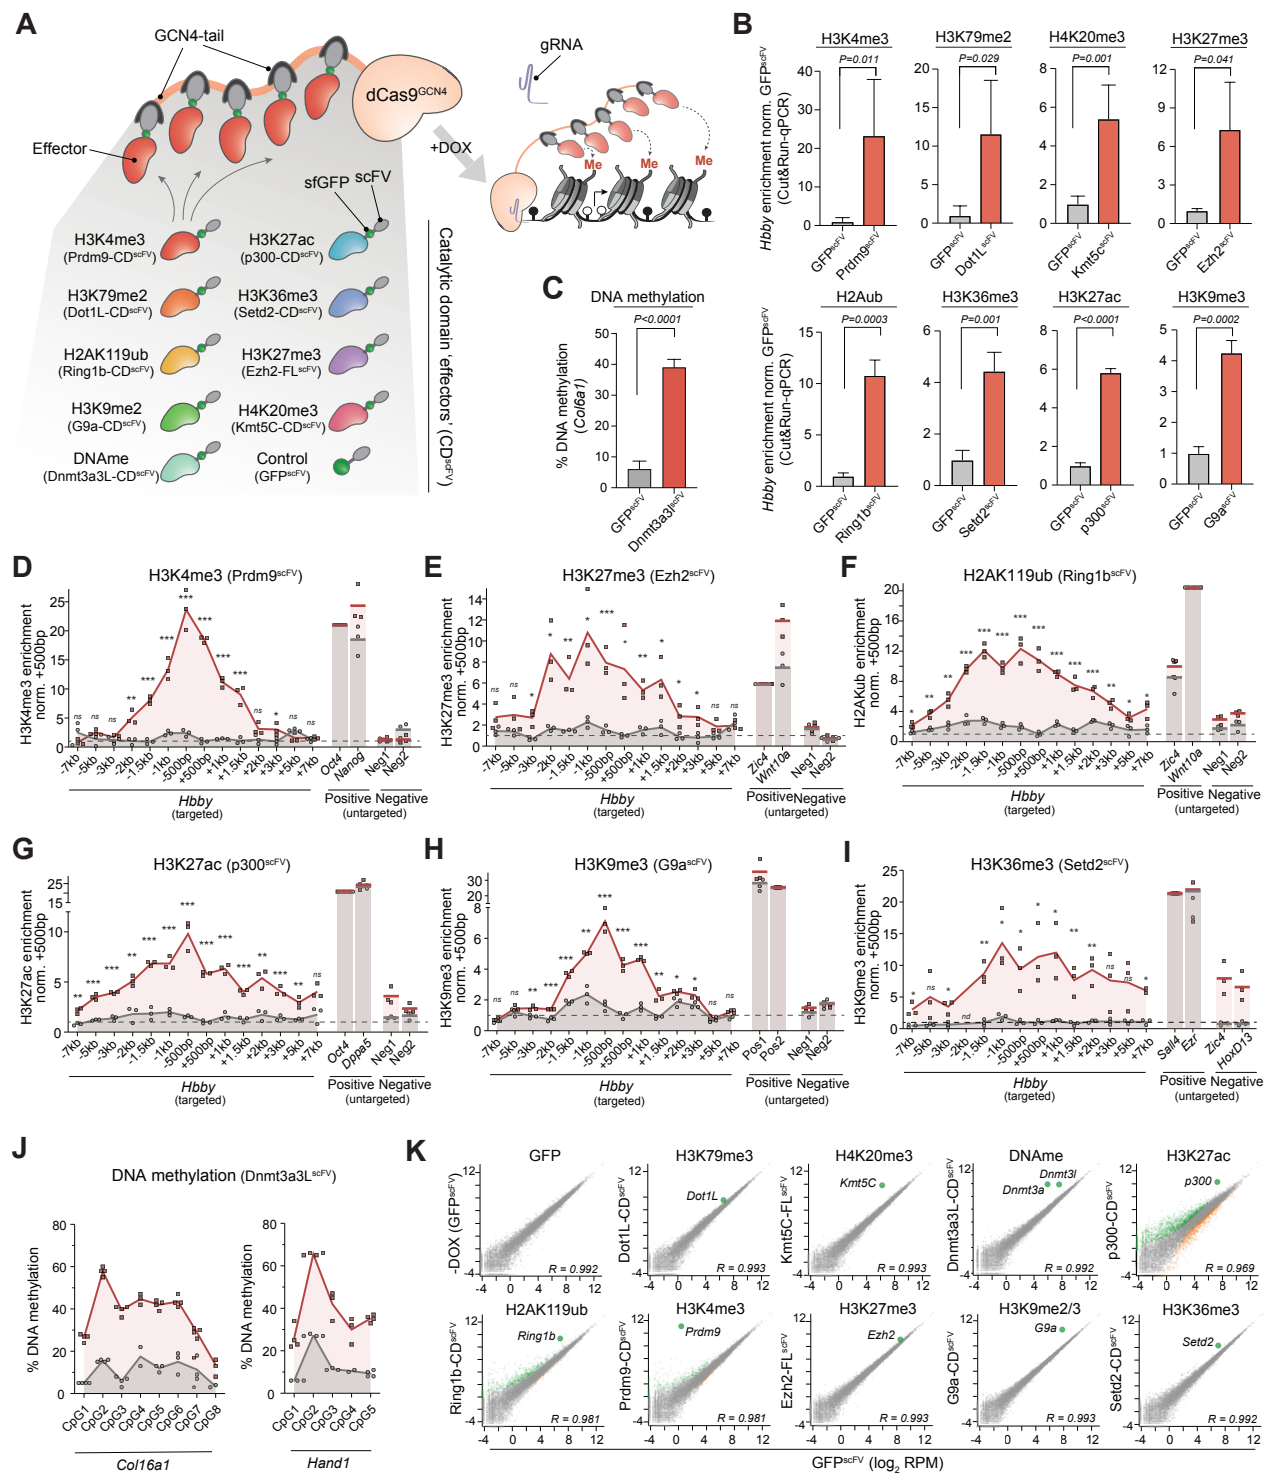

**Figure 1. A modular toolkit for precisely programming chromatin states.**

(A) Schematic of the modular epigenetic editing platform. Upon DOX-induction, dCas9<sup>GCN4</sup> recruits five copies of chromatin-modifying effector(s) or control GFP<sup>scFV</sup> to target loci via a specific gRNA. (B) Relative abundance of the indicated histone modification at *Hbby* assayed by either CUT&RUN- or ChiP-qPCR (H3K36me3, H3K79me2), following epigenetic-editing or control GFP<sup>scFV</sup> recruitment in ESC for seven days. Shown is the mean of three biological replicates; error bars indicate S.D. (C) Histogram showing mean DNA methylation installed at the unmethylated *Col16a1* promoter by epigenetic editing, determined by bisulfite pyrosequencing in triplicate biological samples. (D-I) Relative abundance of the indicated histone modification across the *Hbby* locus after epigenetic programming with a specific CD<sup>scFV</sup> (red line) or control GFP<sup>scFV</sup> (grey line), assayed by CUT&RUN-qPCR. Mean enrichment across a ~14kb region centered on gRNA binding sites is shown for biological triplicate editing, as well for endogenous positive and negative loci for each mark. (J) Percentage DNA methylation at CpG dinucleotides across the *Col16a1* and *Hand1* promoters in triplicate experiments. (K) Scatter plots showing limited global gene expression changes following 7 days targeted deposition of the indicated epigenetic mark at the *Hbby* locus, relative to control GFP<sup>scFV</sup> targeting. Differentially expressed genes are indicated in green/orange. Grey dots indicate unaffected genes. *P*-values in all panels are calculated by unpaired t-test. \**P*<0.05 \*\**P*<0.01, \*\*\**P*<0.001.

107 and H3K27ac were deposited at levels moderately lower than control targets (Fig 1G-I & S1E). Finally,  
108 up to 60% DNA methylation was installed at previously unmethylated promoters (Fig 1J). Taken  
109 together, our inducible epigenetic editing toolkit programmes specific chromatin modifications to target  
110 loci at physiologically-relevant levels, in both amplitude and domain breadth.

111

112 We did not detect OFF-target chromatin deposition at negative (non-targeted) genomic loci with most  
113 effectors (Fig 1D-I & S1E), implying the strategy facilitates specific ON-target chromatin mark editing.  
114 To confirm this further, we performed RNA-seq following DOX-induction of each CD<sup>scFV</sup>. We  
115 observed only minor changes in global gene expression following activation, with the top hit invariably  
116 mapping to the endogenous domain of the activated CD<sup>scFV</sup> chromatin-modifier (Fig 1K & S2A). An  
117 exception is p300-CD<sup>scFV</sup>, for which we observed a global expression impact. To mitigate this going  
118 forward we limited p300-CD<sup>scFV</sup> induction levels by using 20-fold lower DOX. Overall, the data suggest  
119 intrinsic OFF-target activity and/or indirect effects is minimised with our modular CD<sup>scFV</sup> recruitment  
120 design. Thus, we have developed a flexible epigenetic editing toolkit capable of programming high  
121 levels of nine biologically important chromatin modifications to specific endogenous loci. The system  
122 includes multiple controls to isolate the effects of chromatin modifications *per se*, is compatible with  
123 combinatorial mark targeting, and can track temporally-resolved responses and epigenetic memory.  
124 This collectively enables a systematic analysis of the causal function of distinct chromatin states  
125 through precision perturbations, without confounding global effects.

126

### 127 **Chromatin modifications instruct transcriptional outputs at single-cell resolution**

128 To investigate the direct regulatory role of chromatin modifications on transcriptional control, we  
129 initially engineered a reporter system, which facilitates quantitative single cell readouts. Here we  
130 embedded the endogenous *Efla* core promoter (212bp) into a contextual DNA sequence (~3kb) selected  
131 from the human genome to be feature-neutral on the basis of the following criteria: it carries no  
132 transposable elements, is 50% GC, and has minimal transcription factor (TF) motifs (Fig 2A). This  
133 design enables the impact of introducing specific genetic motifs to be tested in future (*see* Fig 4). We  
134 inserted this ‘reference’ (REF) reporter into two distinct genomic locations, chosen to be either  
135 permissive (Chr9) or non-permissive (Chr13) for transcriptional activity (Fig 2A). Consistently, knock-  
136 in to the permissive locus supported strong expression (ON), whereas the non-permissive landing site  
137 resulted in minimal activity (OFF), which partially reflects acquisition of polycomb silencing (Fig 2B  
138 & S2B). These identical reporters residing within distinct genomic locations thus enable controlled  
139 assessment of both activating and repressive activity of an induced chromatin modification on the same  
140 underlying DNA sequence.

141

142 We targeted each CD<sup>scFV</sup> to each reporter, and initially confirmed highly significant programming of  
143 the expected chromatin modification relative to control GFP<sup>scFV</sup> (Fig 2C-K, left panels). Importantly,  
144 targeting catalytic-mutant effectors (mut-CD<sup>scFV</sup>) did not change the chromatin state (Fig 2C-K). We  
145 therefore moved to assess the functional impact of each programmed mark on transcription  
146 quantitatively and in single cells via flow cytometry. Using this sensitive strategy, we were able to  
147 detect that deposition of each tested chromatin modification has the potential to instigate at least some  
148 quantitative transcriptional response. Based on this, we grouped chromatin marks into three functional  
149 categories; (i) Modifications that instruct transcriptional *repression*, with penetrance across the majority  
150 fraction of cells; (ii) Modifications that trigger transcription *activation*, with high penetrance; (iii)  
151 Modifications that have *subtle* and/or *partially penetrant* transcriptional effects.

152

153 The first group is characterised by the polycomb repressive complex 1 (PRC1) modification  
154 H2AK119ub, and the heterochromatin mark H3K9me2, which is endogenously converted to H3K9me3.

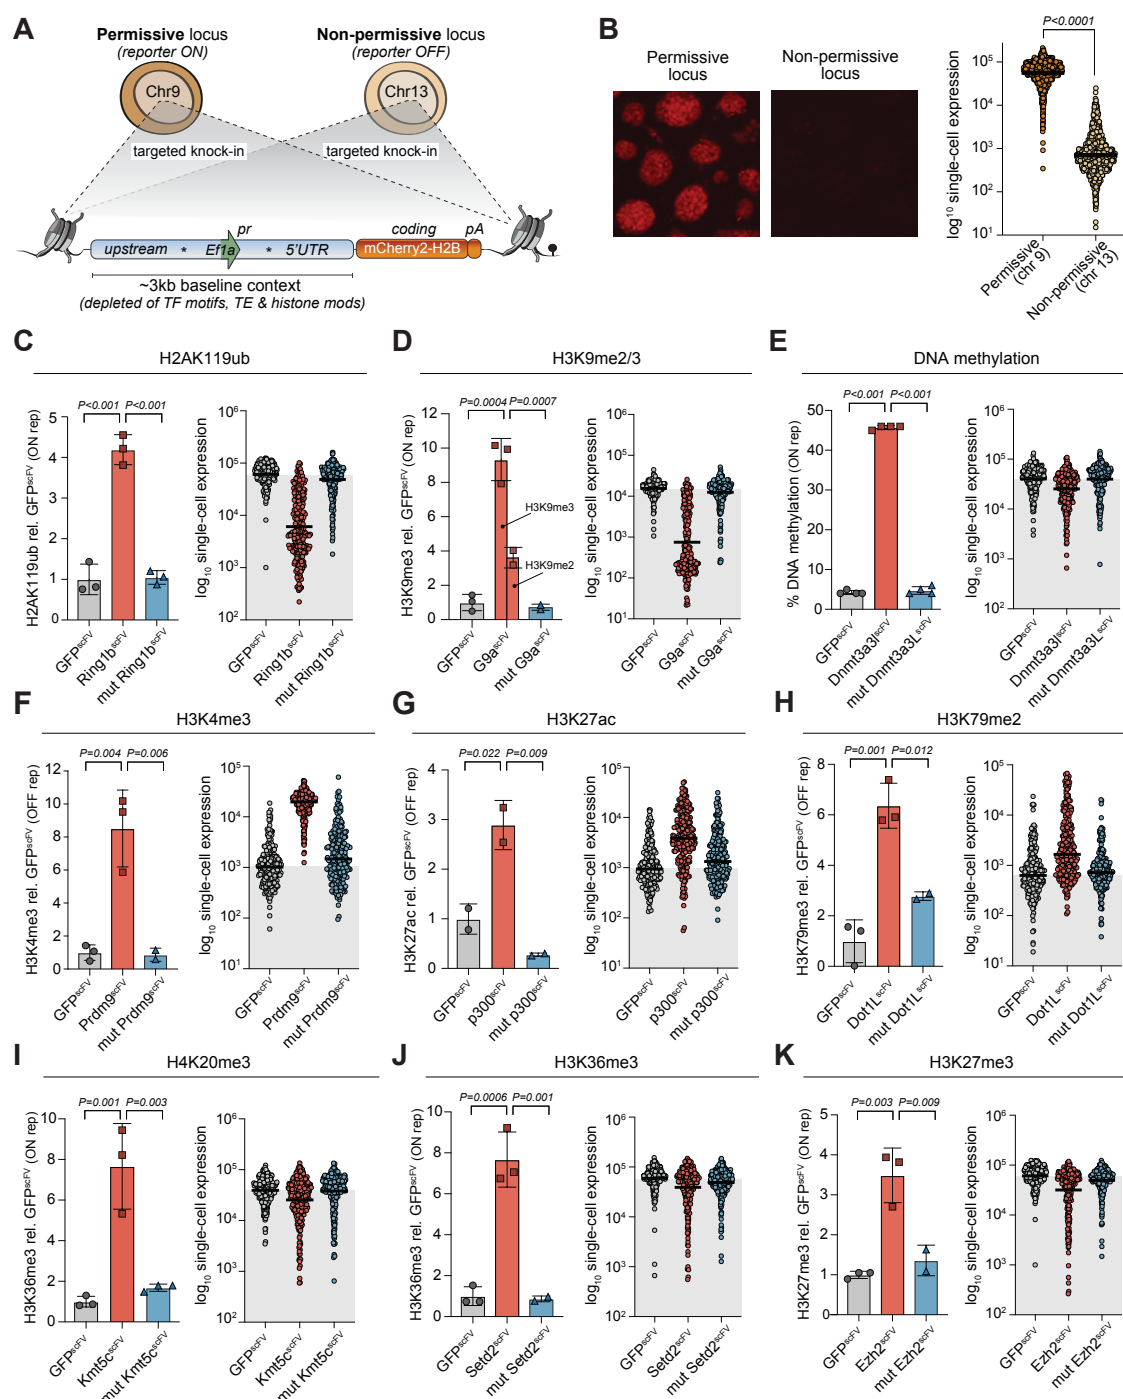

**Figure 2. Distinct chromatin modifications causally instruct transcriptional responses.**

(A) Schematic depicting the structure of the Reference reporter and its targeted integration into either a transcriptionally permissive (chr9, ON) or non-permissive (chr13, OFF) locus. Stars indicate gRNA target sites within the neutral DNA context. (B) Representative fluorescence images (left) and dot plot (right) from quantitative flow cytometry showing activity of the Reference reporter when integrated into either the permissive or non-permissive locus. Bars denote the geometric mean. *P*-value is by unpaired t-test. (C-K) Programming of a specific chromatin modification (left) and transcriptional responses in single-cells (right) for (C) H2AK119ub, (D) H3K9me2/3, (E) DNA methylation, (F) H3K4me3 (G) H3K27ac (H) H3K79me2 (I) H4K20me3 (J) H3K36me3 (K) H3K27me3. Left in each panel: Histogram showing the relative enrichment of the indicated chromatin modification after targeting control GFP<sup>scFV</sup> (grey bar), wild-type CD<sup>scFV</sup> (red bar) or catalytically inactive mut-CD<sup>scFV</sup> (blue bar) for seven days. Displayed is the mean of at least two independent quantifications by CUT&RUN- or CHIP-qPCR. Error bars represent S.D. Right: Dot plot showing log<sub>10</sub> expression (mCherry2) in response to epigenetic editing of the indicated chromatin mark. Each data-point represents a single cell expression value, bars denote the geometric mean in the population. *P*-values are calculated by one-way ANOVA with Tukey's multiple test correction. \**P*<0.05 \*\**P*<0.01, \*\*\**P*<0.001.



155 We find that *de novo* deposition of either H2AK119ub or H3K9me2/3 is sufficient to drive  
156 transcriptional silencing of the permissive (ON) reporter >100-fold in some cells, with average  
157 repression across the population exceeding 10-fold (geometric mean) (Fig 2C-D, right panels).  
158 Moreover, whilst there was heterogeneity, >98% of cells shifted expression below the average level of  
159 control GFP<sup>scFV</sup> in response to either H2AK119ub or H3K9me2/3. DNA methylation is also included  
160 here as its deposition resulted in a modest but penetrant population shift in expression, averaging 1.9-  
161 fold ( $\pm 0.1$  S.D) repression (Fig 2E & S3A). Of note, targeting mut-Ring1b-CD<sup>scFV</sup>, mut-G9a-CD<sup>scFV</sup> or  
162 mut-Dnmt3a3l-CD<sup>scFV</sup> had no significant impact on expression (Fig 2C-E). This indicates that the  
163 H2AK119ub and H3K9me2/3 marks *per se* are sufficient to causally instruct robust silencing of an  
164 active promoter, whilst partial (~50%) DNA methylation causes moderate albeit detectable repression.  
165 Moreover, deposition of H3K9me2/3 or DNA methylation at the non-permissive (OFF) reporter was  
166 capable of inducing even further silencing, potentially via synergising with polycomb (Fig S3A).

167  
168 The second response group comprised chromatin modifications sufficient to induce quantitative  
169 transcriptional activation, when deposited at a repressed promoter. These were represented by  
170 H3K4me3, H3K27ac and H3K79me2. Programming each mark triggered a reproducible population  
171 shift leading to 18.1-fold ( $\pm 3.8$ ), 3.5-fold ( $\pm 0.2$ ), and 2.4-fold ( $\pm 0.4$ ) increased expression, respectively,  
172 with some cells within the population activating >50-fold over GFP<sup>scFV</sup> (Fig 2F-H). Targeting catalytic  
173 inactive mut-Prdm9-CD<sup>scFV</sup>, mut-p300-CD<sup>scFV</sup>, or mut-Dot11-CD<sup>scFV</sup> did not elicit transcriptional  
174 responses. Neither H3K79me2 nor H3K27ac deposition at the active (ON) locus further enhanced its  
175 expression, whereas additional H3K4me3 shifted cells into a narrow band of maximal expression (Fig  
176 S3B). These data indicate acquisition of promoter H3K27ac, and to a lesser extent H3K79me2, can  
177 promote transcriptional activation of a repressed locus, albeit relatively modestly for the latter (Fig 2G-  
178 H). Furthermore, these data surprisingly imply H3K4me3 *per se* has the capacity to instigate strong  
179 transcription upregulation (Fig 2F).

180  
181 The third functional group of chromatin modifications elicited regulatory impacts that led to variable  
182 or weak repressive responses at the active locus. Amongst these, targeted deposition of H4K20me3,  
183 H3K36me3 and H3K27me3 instigated a degree transcriptional repression at the population level. This  
184 amounted to 1.6-fold ( $\pm 0.3$ ), 1.2-fold ( $\pm 0.1$ ), and 1.5-fold ( $\pm 0.1$ ) (geometric mean), respectively, with  
185 the relevant catalytic mutant CD<sup>scFV</sup> controls bearing no effect (Fig 2I-K). Notably however,  
186 H3K27me3, H3K36me3 and H4K20me3 were distinguished by the imposition of strong silencing in a  
187 highly heterogeneous manner (>50-fold in some cells) but with the majority of cells remaining within  
188 the original expression level, resulting in a broad distribution of transcriptional responses (Fig 2I-K &  
189 S3C). Because other equivalently-enriched modifications elicited more penetrant impacts, these  
190 heterogeneous responses likely reflect biological rather than technical outcomes, such as dynamic  
191 competition between *de novo* marks and the transcription machinery. Irrespective, these data support  
192 the principle that the acquisition of H4K20me3, H3K36me3 or H3K27me3 marks are capable of  
193 impacting transcriptional responses heterogeneously within a cellular population, albeit subtly.

194  
195 Finally, we assessed how programming each modification affects chromatin accessibility. In all cases,  
196 we found promoter accessibility is well correlated with the directionality of gene expression induced  
197 by epigenetic editing, further supporting the impact of modifications on transcription (Fig S4A). Indeed,  
198 we also observed a dose-dependent correlation between the induction level of the epigenetic editing  
199 machinery and transcriptional responses, suggesting gene activity can be tuned with chromatin  
200 modifications (Fig S4B-E). In summary, by exploiting a sensitive single-cell readout and precision  
201 epigenome editing, we capture that *de novo* epigenetic marks can causally instigate quantitative changes  
202 in gene expression. We report the magnitude and nature of these changes, which vary from robust, to

203 subtle and/or heterogenous, to non-functional, depending on the identity of the mark and the genomic  
204 context. These data thus support the principle that each of the nine biologically-relevant chromatin  
205 modifications tested here has the *potential* to directly influence transcription output, when measured at  
206 an appropriate quantitative and single-cell resolution.

207

### 208 **H3K4me3 can direct transcription initiation**

209 Amongst the most striking impacts of precision epigenetic editing was that of H3K4me3 deposition,  
210 which induced robust reporter activation (Fig 2F). H3K4me3 is universally correlated with  
211 transcriptional activation, yet whether it is responsible for instructing expression or merely a  
212 consequential marker is intensely debated<sup>14,40</sup>. Indeed, current paradigms suggest H3K4me3  
213 contributes to preventing gene silencing, but does not in itself instigate gene activation<sup>41</sup>. To probe the  
214 functional impact of H3K4me3 further, we generated ESC carrying homozygous knock-in Y2602A  
215 point catalytic mutations (CM) in the key H3K4 methylase *Mll2*, to specifically disrupt its enzymatic  
216 activity (*Mll2*<sup>CM/CM</sup>). This enables the loss-of-function of the H3K4me3 mark *per se* to be assessed  
217 without confounding issues associated with deletion of MLL2 protein/complexes. CUT&RUN  
218 identified a cluster of 3,332 MLL2-dependent H3K4me3 promoter peaks that are lost in *Mll2*<sup>CM/CM</sup> ESC,  
219 whilst 13,477 promoters retain H3K4me3, likely due to redundant H3K4me3 modifiers (Fig 3A).  
220 Amongst genes that lose H3K4me3, expression of 458 (90%) is significantly downregulated  
221 ( $P(\text{adj}) < 0.05$ ), with only 53 (10%) upregulated, consistent with H3K4me3 *per se* playing a role in  
222 preventing gene repression. Indeed, promoter clusters with no H3K4me3 change are equally likely to  
223 be up- or down-regulated (Fig 3A & S5A-B). Moreover, promoters that lose H3K4me3 in *Mll2*<sup>CM/CM</sup>  
224 ESC also become depleted of H3K27ac and exhibit a gain of diffuse H3K27me3 domains (Fig S5C-  
225 D). This implies that specific removal of H3K4me3, but not MLL2, unmask the potential for silencing  
226 of a subset of genes that were previously active.

227

228 To distinguish whether H3K4me3 simply safeguards against silencing versus whether H3K4me3 is  
229 capable of *instigating* transcriptional upregulation, we next programmed H3K4me3 back to eight genes  
230 that became repressed in *Mll2*<sup>CM/CM</sup> cells, of which seven lose H3K4me3. Upon DOX-induction of  
231 Prdm9-CD<sup>scFV</sup> to restore H3K4me3, we found all seven genes showed a trend of reactivation, with 5 of  
232 7 reaching significant transcriptional rescue, including *Setmar*, *Dazl* and *Ddx4* (Fig 3B & S6A). In  
233 contrast, the control *Pldn* gene, which is downregulated without H3K4me3 loss in *Mll2*<sup>CM/CM</sup> cells,  
234 exhibited no reactivation (Fig S6A). This suggests that acquisition of H3K4me3 at promoters can  
235 activate endogenous genes that were previously expressed, prior to genetically-induced depletion of  
236 H3K4me3.

237

238 To examine whether H3K4me3 can also instigate expression of genes that are never active in a given  
239 cell type, we targeted H3K4me3 to eight randomly selected silent promoters in naïve ESC. Installation  
240 of H3K4me3 resulted in significant activation at 3 out of 8 of these genes, with maximal upregulation  
241 reaching >400-fold at *Cldn16* (Fig 3C). Importantly, targeting the catalytically inactive mut-Prdm9-  
242 CD<sup>scFV</sup> had no detectable impact. These data support the conclusion that forced programming of  
243 H3K4me3 at promoters can overcome silencing to induce *de novo* transcription - at least at some genes  
244 - and that this reflects the activity of the H3K4me3 mark itself.

245

246 To further examine whether H3K4me3 *per se* rather than the Prdm9-CD<sup>scFV</sup> effector can instruct  
247 transcription, we generated an independent H3K4me3 effector based on the catalytic core of *Set1a*  
248 (Set1A-CD<sup>scFV</sup>). We used our modular dCas9<sup>GCN4</sup> system to target compound Set1A-CD<sup>scFV</sup> to the OFF  
249 reporter, which triggered robust activation amongst a significant fraction of cells (Fig 3D). Indeed,  
250 >85% cells express above control average in response to H3K4me3, with 3.3-fold ( $\pm 0.3$  S.D) increased

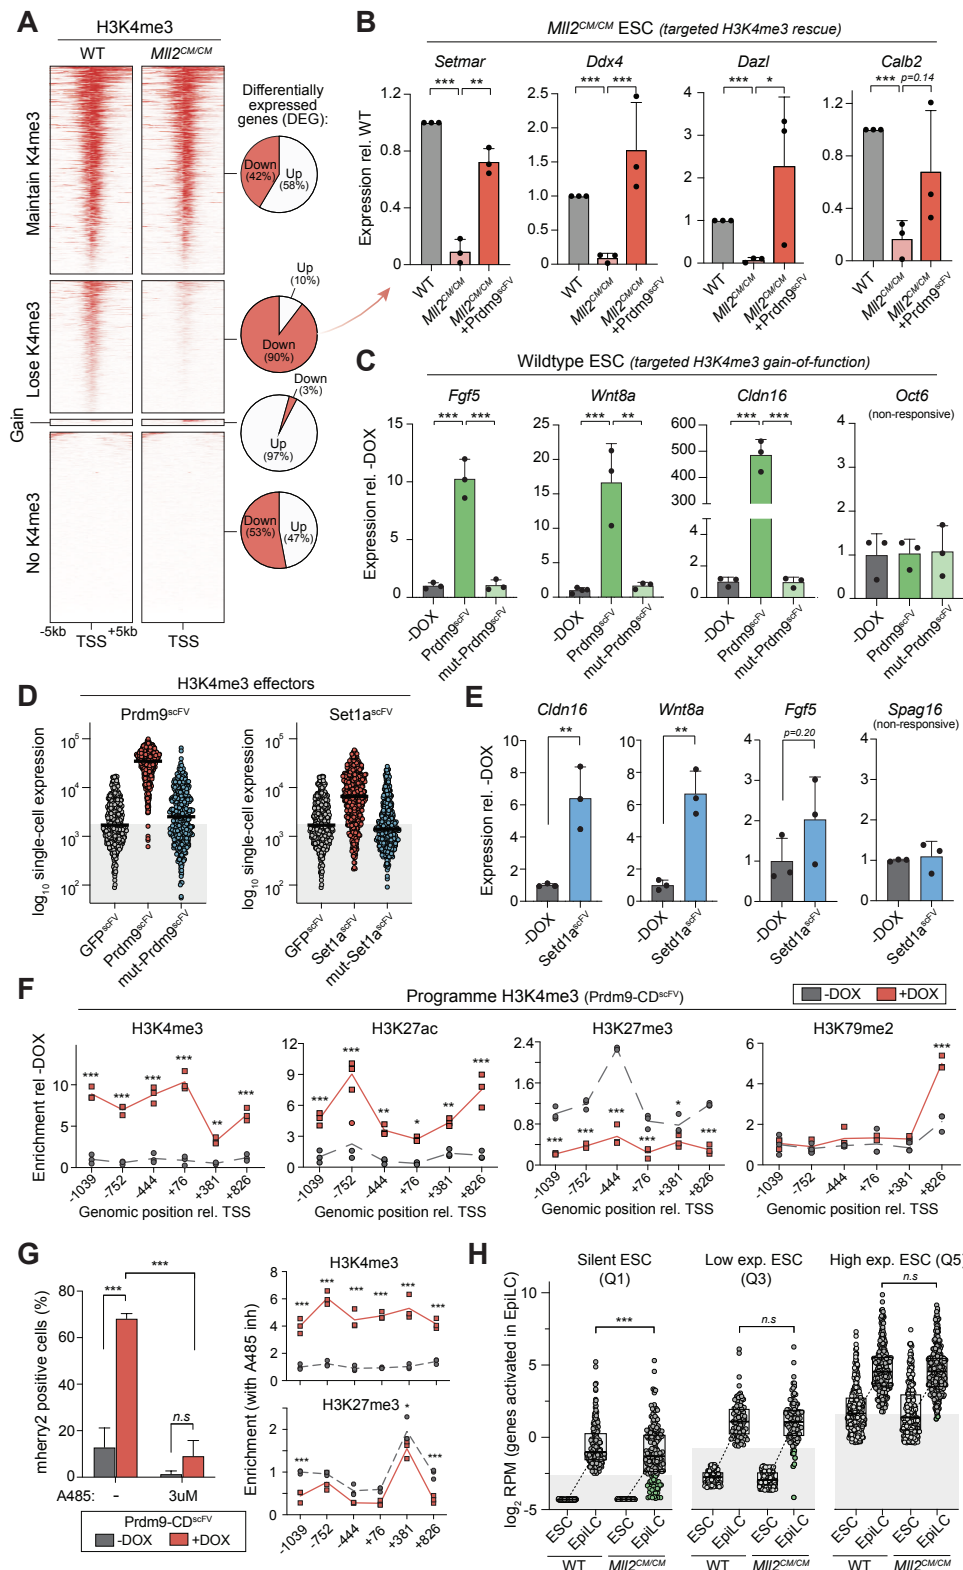

**Figure 3. De novo H3K4me3 triggers transcription upregulation.**

**(A)** H3K4me3 enrichment over the transcriptional start site (TSS)  $\pm 5\text{kb}$  in wild-type and *MI12<sup>CM/CM</sup>* ESC, stratified according to H3K4me3 change in *MI12<sup>CM/CM</sup>* ESC. The percentage of up- or down- differentially expressed genes in each category is shown. **(B)** Bar plots showing expression of indicated genes in wild-type, *MI12<sup>CM/CM</sup>* and *MI12<sup>CM/CM</sup>* + Prdm9<sup>scFV</sup> ESC, in which H3K4me3 has been programmed back to a repressed endogenous promoter. Shown is mean of three biological replicates by qRT-PCR. Error bars represent S.D and significance of rescue is calculated by unpaired t-test. **(C)** Bar plots of endogenous gene expression in wild-type ESC or upon targeting with Prdm9<sup>scFV</sup> to programme H3K4me3, or mut-Prdm9<sup>scFV</sup>. Data is the mean of biological triplicates; error bars represent S.D. Significance is calculated by one-way ANOVA with Tukey's correction. **(D)** Dot plots showing expression at the OFF reporter after targeting with distinct H3K4me3 effectors Prdm9<sup>scFV</sup> (left) or Set1a<sup>scFV</sup> (right). Each data point is a cell and bars denote the geometric mean. **(E)** Bar plots of gene expression in wild-type ESC targeted with Set1a<sup>scFV</sup> or untargeted (-DOX), by RT-qPCR from biological triplicates. Error bars S.D with significance by unpaired t-test. **(F)** Epigenetic landscape response at the OFF reporter before (-DOX) and after (+DOX) specific H3K4me3 programming. Indicated indicated histone modification enrichment across  $\sim 2\text{kb}$  in triplicate technical samples, with significance calculated by unpaired t-test. **(G)** Left: Bar plots showing the percentage of mCherry positive cells is restricted after (+DOX) H3K4me3 installation by Prdm9<sup>scFV</sup> in the presence of p300 inhibitor A485. Data is biological triplicate, error bars represent S.D. *P-values* calculated by two-way ANOVA. Right: Relative abundance of the indicated histone modifications after programming H3K4me3 (+DOX) in presence of A485. **(H)** Dot plots showing log expression of genes (grey dots) that are normally activated in EpiLC stratified into quintiles (Q) according to their initial expression level in ESC. Box plots indicate median and interquartile range. Genes that fail to activate in *MI12<sup>CM/CM</sup>* EpiLC are shown in green. Significance is calculated by unpaired t-test, \**P* < 0.05, \*\**P* < 0.01, \*\*\**P* < 0.001.

251 transcription across the population. The catalytic-inactive mut-Set1A-CD<sup>scFV</sup> effector had no impact  
252 (Fig 3D). Of note, the graded level of activation induced by each effector (Prdm9-CD<sup>scFV</sup> > Set1A-  
253 CD<sup>scFV</sup>) correlated with the amount of H3K4me3 they each deposited (Fig S6B), suggesting a dose-  
254 dependent impact of H3K4me3. Indeed, analysis of cells that failed to activate revealed they still acquire  
255 H3K4me3, but that responsive cells acquire more H3K4me3 (Fig S6C), implying a threshold level  
256 triggers a switch into active transcription at the single-cell level. Finally, we also targeted endogenous  
257 genes with Set1A-CD<sup>scFV</sup>, and again observed a significant transcriptional activation of some (2/4) upon  
258 H3K4me3 deposition (Fig 3E). Taken together, independent targeted gain-of-function approaches  
259 support the principle that sufficient H3K4me3 can activate productive transcription at otherwise silent  
260 promoters. Furthermore, the data show that in some instances, *de novo* H3K4me3 is not sufficient to  
261 activate transcription.

262

### 263 **Developmental role of H3K4me3**

264 We next investigated the potential mechanisms through which H3K4me3 operates, by initially asking  
265 whether *de novo* H3K4me3 directs remodelling of the local chromatin landscape. We found that  
266 programming H3K4me3 to the OFF reporter caused a highly significant secondary recruitment of  
267 H3K27ac (Fig 3F). In parallel H3K27me3 is evicted by H3K4me3 deposition and there is a gain in  
268 promoter accessibility, whilst H3K79me2 remains largely unaltered (Fig 3F). This suggests *de novo*  
269 H3K4me3 establishment directly influences the balance of distinct H3K27 modifications, and more  
270 generally facilitates promoter acetylation. Because histone acetylation is linked with active  
271 transcription, we asked whether its recruitment is necessary for H3K4me3-mediated effects. We  
272 programmed H3K4me3 to the OFF reporter with or without the specific p300/CBP inhibitor, A485,  
273 which specifically blocks its acetyltransferase activity, including against H3K27ac, H3K18ac and H2B  
274<sup>42</sup>. A485 did not affect efficient programming of H3K4me3 (Fig 3G). However, the presence of A485  
275 (3uM) restricted subsequent H3K4me3-mediated activation to <10% of cells, compared to ~70% in no-  
276 inhibitor controls (Fig 3G & S6D). Programming H3K4me3 in the presence of A485 also largely  
277 blocked displacement of H3K27me3. This supports a hierarchical model whereby *de novo* H3K4me3  
278 may functionally operate, at least partially, via directly or indirectly facilitating promoter acetylation  
279 and evicting epigenetic silencing systems.

280

281 To examine the potential physiological role for H3K4me3 in contributing to gene activation  
282 programmes during development, we induced differentiation of naive *Mll2*<sup>CM/CM</sup> ESC into formative  
283 epiblast-like cells (EpiLC). This triggers 1,380 genes to undergo robust upregulation ( $p(\text{adj}) < 0.05$ ;  
284  $\log_2(\text{FC}) > 2$ ) in wildtype cells. The majority of these genes activated normally in *Mll2*<sup>CM/CM</sup> EpiLC, and  
285 indeed naïve and formative markers exhibited appropriate changes, suggesting MLL2-mediated  
286 H3K4me3 is not requisite for EpiLC cell fate transition (Fig S7A-C). However, by stratifying  
287 upregulated EpiLC genes into quintiles based on their initial expression level in ESC, we found that  
288 H3K4me3 *per se* appears necessary for activation of a subset of genes that are silent in ESC and then  
289 induced *de novo* in EpiLC (Fig 3H & S7D). Specifically, genes in the lowest quintile (Q1) of ESC  
290 expression fail to activate as expected in *Mll2*<sup>CM/CM</sup> EpiLC ( $P=0.0028$ ), whereas those genes that are  
291 already weakly or fully expressed in ESC (Q3-Q5), are competent to be upregulated (Fig 3H). For  
292 example, *Colla2*, *Spon1* and *Lrp1b* normally acquire H3K4me3 and lose H3K27me3 coincident with  
293 upregulation in EpiLC, but fail to be appropriately activated in *Mll2*<sup>CM/CM</sup> EpiLC that lack H3K4me3  
294 catalytic activity (Fig S7D-E). This data collectively implies H3K4me3 contributes to initiating  
295 transcriptional activation of a subset of genes during cell fate transition.

296

297 In summary, our precision epigenetic editing strategy demonstrates that *de novo* H3K4me3 installation  
298 is sufficient to remodel the chromatin landscape and instigate transcriptional upregulation, at least at  
299 some genes, rather than simply reflecting a consequence of activity.

300

### 301 **Epigenetic marks interact with *cis* genetic motifs to modulate transcription**

302 The precise functional impact of a given histone modification is likely dependent on contextual  
303 interactions, including with the underlying DNA sequence features at each promoter. We therefore next  
304 used our epigenetic editing strategy to investigate the interplay between DNA sequence variants and  
305 chromatin function. We generated a repertoire of reporters wherein each comprises the identical ~3kb  
306 baseline sequence derived from the reference (REF) reporter (Fig 2A), but is distinguished by insertion  
307 of several short DNA motifs (8-14bp), thus establishing an allelic series. We selected motifs  
308 corresponding to binding sites of specific transcription factors (OCT4, OTX, MYC, GATA) or that  
309 impact chromatin architecture either indirectly through the recruitment of architectural proteins (CTCF,  
310 YY1) or directly via formation of G-quadruplexes (G4-U, G4-D)<sup>43,44</sup> (Fig 4A & Fig S8A). We knocked-  
311 in each reporter, which only differ by a few base pairs, into both the permissive (ON) and non-  
312 permissive (OFF) genomic landing sites (*see* Fig 2A). Most motifs did not impact baseline expression  
313 levels, albeit inclusion of CTCF, G4-U or YY1 motifs decreased expression at the permissive locus,  
314 partly due to increased heterogeneity (Fig 4B). Overall, we generated a series of reporters that carry  
315 specific DNA sequence variants, within highly-controlled genomic environment(s).

316

317 To systematically explore *cis* genetic x epigenetic functional interplays, we installed each chromatin  
318 modification, to each reporter, within each genomic context. We first focussed on the 'ON' reporter(s)  
319 (permissive locus), which as expected, were not significantly impacted by further deposition of positive  
320 marks H3K27ac, H3K4me3 and H3K79me2. In general, repressive modifications exhibited a good  
321 concordance in function across the reporter series. For example, H3K9me2/3 and H2AK119ub  
322 manifested strong silencing by day 7 (d7) of induction irrespective of most underlying motifs, with  
323 H3K9me2/3 exhibiting the faster repression kinetics (Fig 4C). Nevertheless, we did observe a number  
324 of striking functional interactions between specific marks and *cis* genetics, which were highly  
325 reproducible across replicates (Fig 4C & S8B-C). For example, the presence of YY1 motifs within an  
326 otherwise identical sequence effectively blocked the capacity for H2AK119ub and H3K27me3 to  
327 instruct transcriptional repression. Such YY1 sites also dampened the quantitative impact of DNA  
328 methylation and H3K9me2/3 (Fig 4C). Conversely, the presence of OTX motifs rendered the reporter  
329 more amenable to repression by DNA methylation. The most salient observation however related to  
330 H3K36me3, which generally has a weak and partially-penetrant effect on transcription across the series.  
331 However, programming H3K36me3 specifically on the +CTCF motif reporter resulted in a switch-like  
332 behaviour, with imposition of highly significant transcriptional silencing beyond levels obtained with  
333 any other repressive mark across any context (Fig 4C).

334

335 To validate these contextual relationships, we generated independent knock-in reporter lines and  
336 targeted them with specific chromatin modifications. We confirmed inclusion of *cis* YY1 motifs  
337 robustly neutralised the repressive activity of H2AK119ub and H3K9me2/3 (Fig 4D-E). Quantitatively  
338 this meant expression was diminished by only 1.5-fold and 4.3-fold by H2AK119ub and H3K9me2/3  
339 respectively, rather than 6.1-fold and 18.5-fold repression of the baseline reporter that lacked 12bp YY1  
340 sites. Whilst the link between DNA methylation and OTX motifs was variable (Fig S8C), we  
341 reproducibly observed that the inclusion of CTCF motifs, within an otherwise identical genomic  
342 context, licensed H3K36me3 to instruct transcriptional silencing exceeding 20-fold at the population  
343 level, with >98% of cells responding (Fig 4F & S8B). In contrast there is almost no effect of H3K36me3  
344 on the REF promoter.

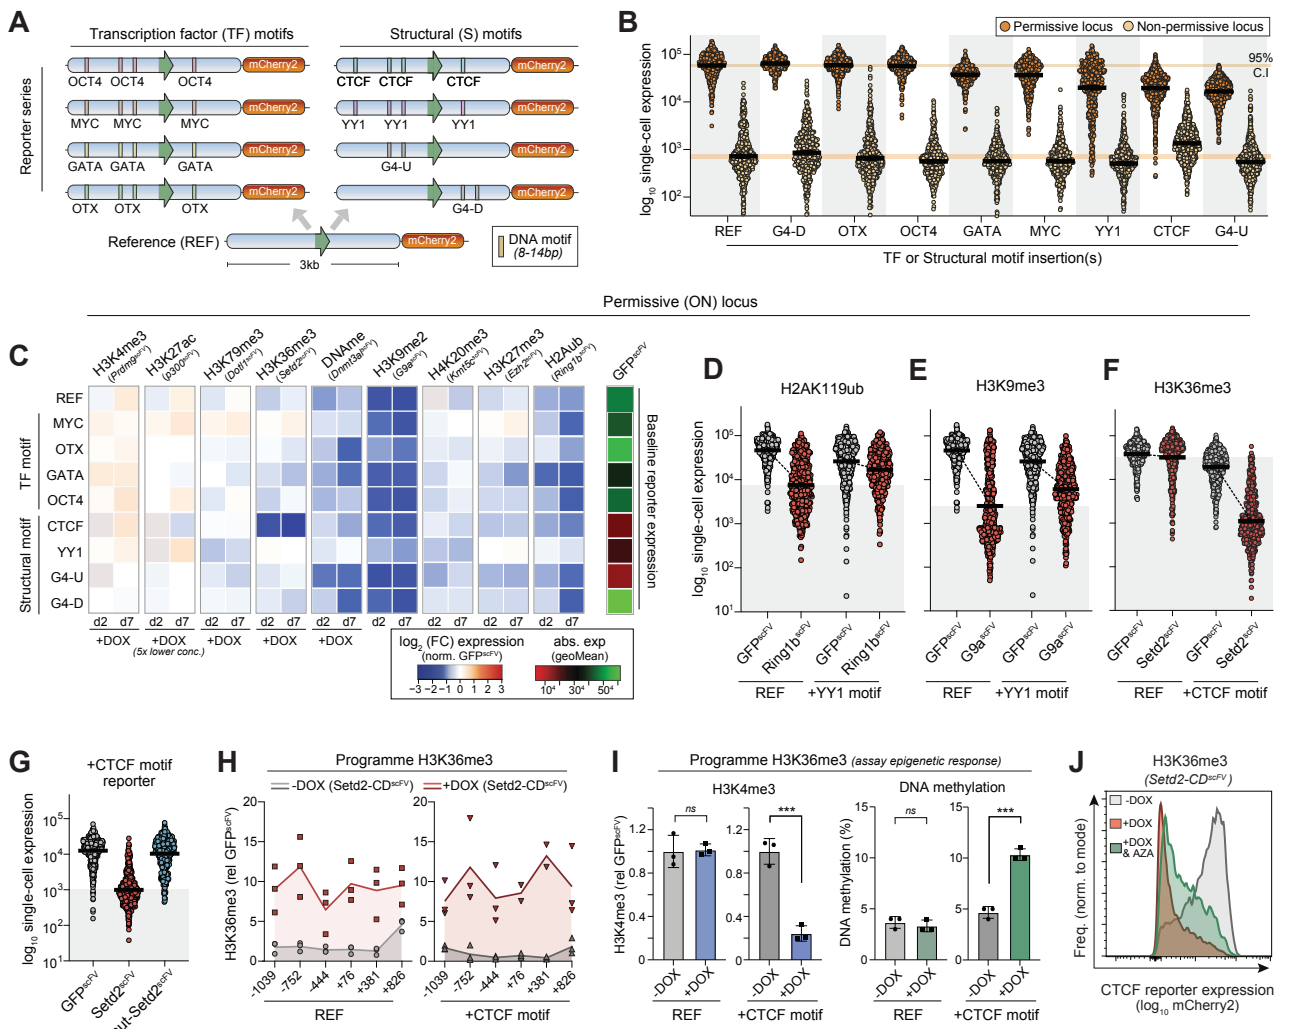

**Figure 4. Functional interplay between chromatin marks and transcription factor motifs.**

(A) Schematic of the reporter series whereby each is identical apart from insertion of specific short sequence motifs. (B) Dot plots of mCherry2 expression from the indicated reporter type, integrated in either the permissive or the non-permissive locus. Each data point is a single cell and bars denote geometric mean. (C) Heat map showing the  $\log_2$  fold-change in transcription at the ON locus upon programming the indicated chromatin mark (x-axis) to the indicated *cis* motif reporter (y-axis), relative to control GFP<sup>scFV</sup> targeting. Data is shown after two days (d2) and 7 days (d7) of DOX-induced epigenetic editing and corresponds to the average of four technical replicates. (D-F) Dot plots showing independent validations of functional interactions between programmed epigenetic marks and underlying sequence motifs. Each data point is  $\log_{10}$  expression in a single cell carrying the indicated reporter, and bars denote geometric mean. (G) Dot plots of  $\log_{10}$  single-cell expression of the +CTCF reporter after GFP<sup>scFV</sup>, Setd2<sup>scFV</sup> (H3K36me3) or mut-Setd2<sup>scFV</sup> targeting for 7 days. Bars denote the geometric mean. (H) Relative abundance of H3K36me3 at the Reference (left) or +CTCF (right) reporters assayed by ChIP-qPCR before (-DOX) or after (+DOX) Setd2<sup>scFV</sup> induction, across a ~2kb region. Lines denote the mean of three replicates. (I) Bar plots showing the enrichment of H3K4me3 (left) and percentage of DNA methylation (right) on either the Reference or +CTCF reporters following programming of H3K36me3. Error bars represent S.D. with significance by unpaired t-test. (J) Representative flow cytometry plot showing expression of the +CTCF reporter before (-DOX) or after (+DOX) programming H3K36me3 +/- the DNA methylation inhibitor AZA.

345

346 We confirmed that this context-dependent H3K36me3 activity is driven by the mark itself, since  
347 targeting the mut-Setd2-CD<sup>scFV</sup> effector had no impact on transcription (Fig 4G). Moreover, H3K36me3  
348 is programmed to comparable (high) levels on both the REF and the +CTCF motif reporter types, ruling  
349 out that differential responses are linked with disparities in initial epigenetic editing (Fig 4H). However,  
350 upon H3K36me3 programming specifically at the +CTCF reporter, the level of H3K4me3 decreased  
351 sharply. In contrast, H3K4me3 remained unaffected by *de novo* H3K36me3 on the REF (Fig 4I). DNA  
352 methylation was also preferentially increased only on the +CTCF reporter following installation of  
353 H3K36me3 (Fig 4I). Thus, equivalent levels of H3K36me3 induce different epigenetic cascades  
354 depending on the underlying genetic sequence/motifs.

355

356 To test the functional significance of this, we targeted Setd2-CD<sup>scFV</sup> to the +CTCF reporter coincident  
357 with 5-azacytidine (AZA) treatment, a potent DNA methylation inhibitor. AZA reduced the fraction of  
358 cells that fully switch OFF the +CTCF reporter in response to H3K36me3, implying a partial role for  
359 DNA methylation recruitment downstream of H3K36me3 function (Fig 4J). We conclude the functional  
360 output of H3K36me3 is sensitive to the *cis* genomic sequence and its susceptibility to downstream  
361 epigenomic remodelling. Taken together, these data exploit a controlled system to reveal that  
362 underlying genetic motifs or variants mediate complex regulatory interactions with epigenetic  
363 modifications that quantitatively influence the transcriptional response. This implies the precise  
364 function of a chromatin modification ‘peak’ is not unequivocal, but highly context-dependent.

365

### 366 **Functional interplay between activating marks and TF motifs**

367 We next examined genetic x epigenetic interactions within the transcriptionally silent genomic context,  
368 noting that with the exception of H3K9me2/3, and H3K36me3 on the CTCF reporter, repressive  
369 modifications could not drive further silencing irrespective of genetic motifs. Programming H3K79me2  
370 installed weak activation, with no major variation across *cis* contexts. However, we observed significant  
371 interplay between H3K4me3- and H3K27ac- mediated activation and underlying sequence motifs. For  
372 example, the presence of either MYC or YY1 sequence motifs strongly reduced or even neutralized the  
373 activity of both H3K4me3 and H3K27ac (Fig 5A). Conversely, OCT4 and OTX2 motifs synergised  
374 with H3K4me3 and H3K27ac, respectively, potentiating their positive effect on transcription in ESC.  
375 We again validated our results by introducing the epigenetic editing machinery into independent knock-  
376 in reporter clones. This confirmed that the function of H3K27ac is reciprocally modulated by the  
377 presence of short motifs - MYC (attenuates) and OTX (enhances) (Fig 5B-C) - which manifests as a  
378 1.4-fold versus 5.1-fold activation by H3K27ac, relative to 3.5-fold in the REF context. We further  
379 confirmed significant interactions between +MYC, +OCT4, or +CTCF *cis* contexts and H3K4me3  
380 effects (Fig 5D & S8C).

381

382 To investigate the mechanistic nature of such context-dependent responses, we focused on the  
383 attenuation of H3K4me3 (and H3K27ac) function by MYC motifs, which we observed across clones  
384 (Fig 5E). We first knocked out *Myc* in ESC carrying the +MYC reporter using CRISPR. Programming  
385 H3K4me3 in *Myc*<sup>-/-</sup> ESC still led to attenuated activation of the +MYC motif reporter relative to REF,  
386 and indeed actually increased the fraction of non-responding (OFF) cells, potentially because *Myc* is  
387 associated with transcription activation<sup>45</sup>. This implies that recruitment of *trans* MYC protein does not  
388 underpin the interaction between the *cis* DNA motif and H3K4me3 (Fig 5F). We therefore next focused  
389 on the variant polycomb complex PRC1.6, which also specifically binds MYC motifs (also known as  
390 E-box)<sup>46</sup>. We generated knockout ESC lines for the key PRC1.6 component *Pcgfb*, and installed  
391 H3K4me3 at the +MYC reporter in *Pcgfb*<sup>-/-</sup> cells. This reproducibly led to a rescue of attenuation, and  
392 significantly increased activation relative to programming H3K4me3 in WT controls (Fig 5G).

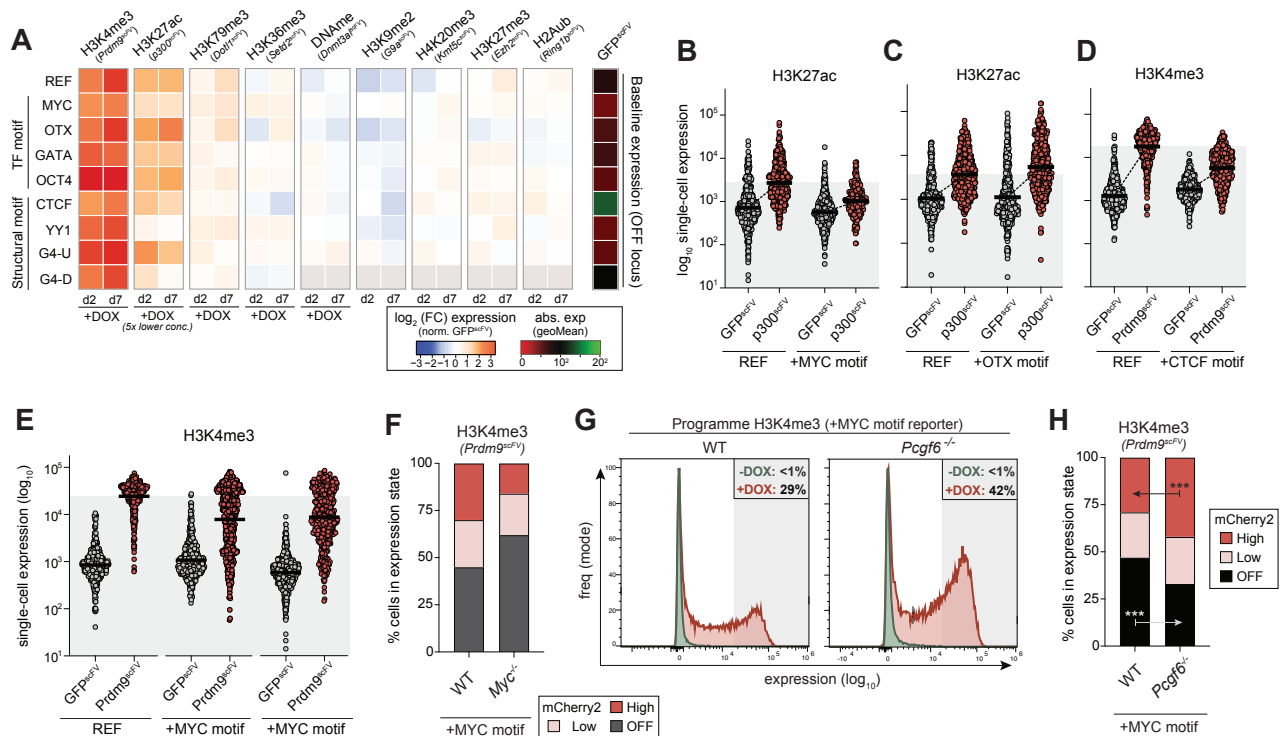

**Figure 5. Instructive activity of chromatin modifications is throttled by *cis* genetics.**

**(A)** Heat map showing the  $\log_2$  fold-change in transcription at the OFF locus upon programming the indicated chromatin mark (x-axis) to the indicated *cis* motif reporter (y-axis), relative to control GFP<sup>scFV</sup> targeting. Data is shown after two (d2) and seven days (d7) of DOX-induced epigenetic editing and corresponds to the average of four technical replicates. **(B-D)** Dot plots showing independent validations of functional interactions between programmed epigenetic marks and underlying sequence motifs. Each data point is  $\log_{10}$  expression of the indicated reporter variant in a single cell after control GFP<sup>scFV</sup> or specific CD<sup>scFV</sup> epigenetic editing for 7 days. Bars denote the geometric mean. **(E)** Dot plots showing single-cell expression of independent +MYC reporters is limited after induction of H3K4me3, relative to control REF reporter. **(F)** Contingency plot indicating the fraction of cells that acquire a “off”, “low” or “high” expression state following H3K4me3 programming, in a wild-type (WT) or a *Myc*<sup>-/-</sup> genetic background. **(G)** Representative flow cytometry plot showing the inactive +MYC reporter expression before (-DOX) or after (+DOX) Prdm9<sup>scFV</sup> targeting for 5 days, in either a wild-type (WT) or a *Pcgf6*<sup>-/-</sup> genetic background. **(H)** Contingency plot indicating an elevated fraction of cells acquire the “high” expression state with +MYC reporter following H3K4me3 programming in *Pcgf6*<sup>-/-</sup> ESC. Significance is calculated by two-way ANOVA \**P*<0.05 \*\**P*<0.01, \*\*\**P*<0.001.



393 Specifically, whilst the fraction of cells weakly activating the +MYC reporter in response to H3K4me3  
394 was similar between WT and *Pcgl6*<sup>-/-</sup> cells, the fraction of cells that fully activated the reporter was  
395 significantly increased in the absence of *Pcgl6* ( $P < 0.001$ ; unpaired t-test) (Fig 5H). These data suggest  
396 that recruitment of PRC1.6 to promoters via MYC/E-box motifs provides a genetically encoded  
397 mechanism that limits the maximal expression induced by epigenetic systems such as H3K4me3. More  
398 generally, these data underline the relevance of genomic context in mediating the quantitative  
399 regulatory output of a chromatin mark.

400

#### 401 **Naïve ESC antagonise epigenetic memory**

402 We next deployed our editing toolkit to interrogate other regulatory questions. We first asked whether  
403 epigenetically programmed transcriptional states can be inherited through mitotic divisions and whether  
404 DNA context impacts this. We targeted each CD<sup>scFV</sup> to each reporter in each genomic context for seven  
405 days to install the panel of epigenetic modifications, and then withdrew DOX to remove the inducing  
406 signal. Despite robust initial transcriptional responses, upon seven days withdrawal of the editing  
407 machinery (DOX wo) we observed no significant long-term memory of either activated or repressed  
408 reporter activity (Fig 6A-B). This was evident for all tested genetic contexts and regardless of genomic  
409 location, implying that transcriptional changes instigated by *de novo* chromatin marks are robustly reset  
410 to baseline in naïve ESC. Such lack of ‘epigenetic memory’ is consistent with recent observations that  
411 acquired heterochromatin domains do not propagate in naïve pluripotent cells<sup>38</sup>.

412

#### 413 **Combinatorial epigenetic editing reveals functional synergy of PRC1 and PRC2 activity**

414 We finally asked if and to what extent combinatorial chromatin marks interact with one another to  
415 synergise or antagonise their quantitative effects on transcription. Our modular dCas9<sup>GCN4</sup> system can  
416 recruit multiple CD<sup>scFV</sup> effectors simultaneously. We therefore induced pairs of CD<sup>scFV</sup> together,  
417 focusing on combinatorial marks that co-occur on chromatin (Fig 6C). Amongst functional interactions,  
418 we noted that concomitant deposition of H3K9me2/3 and DNA methylation (Dnmt3a3l-CD<sup>scFV</sup> + G9a-  
419 CD<sup>scFV</sup>) increased the robustness of the transcriptional silencing response, relative to deposition of each  
420 mark singularly. Specifically, whilst the maximal level of repression amongst single cells was similar  
421 to H3K9me2/3, there was an increase in the fraction of cells that fully silenced expression when DNA  
422 methylation was co-targeted (35%±6 vs 41%±4), indicating these marks may cooperate to confer  
423 robustness (Fig 6C & S9A). Accordingly, when DNA methylation was inhibited following H3K9me2/3  
424 deposition using AZA (Fig S9B), an elevated percentage of cells did not fully silence reporter activity  
425 (Fig S9C).

426

427 The most striking synergy however came from co-targeting H3K27me3 and H2AK119ub (Ezh2-CD<sup>scFV</sup>  
428 + Ring1b-CD<sup>scFV</sup>), which instigated a highly significant increase in the single-cell penetrance of  
429 silencing, relative to installing either mark individually (Fig 6C-E & S9D-E). This effect was  
430 particularly intriguing since it is not clear whether the transcriptional impact of PRC1 (H2AK119ub)  
431 and PRC2 (H3K27me3) at polycomb domains arises from the sum of their individual activities. We  
432 confirmed that significant levels of both H3K27me3 and H2AK119ub are programmed by  
433 combinatorial targeting (Fig 6D). Moreover, independent ESC lines supported that such multiplex  
434 epigenetic editing led to a functional synergism, with 41% (±7% S.D) of cells reaching the fully OFF  
435 state, relative to deposition of H2AK119ub (28% ±7;  $P = 0.029$ ) or H3K27me3 (7% ±3;  $P < 0.001$ ) alone  
436 (Fig 6E & S9E). Importantly, catalytic mutant effectors registered only a subtle negative effect on  
437 reporter activity. Overall, these data suggest that combinatorial chromatin modifications can increase  
438 the single-cell penetrance of transcriptional responses, with H3K27me3 and H2AK119ub together  
439 exemplifying effects greater than the sum of their parts. Such functional interactions between marks

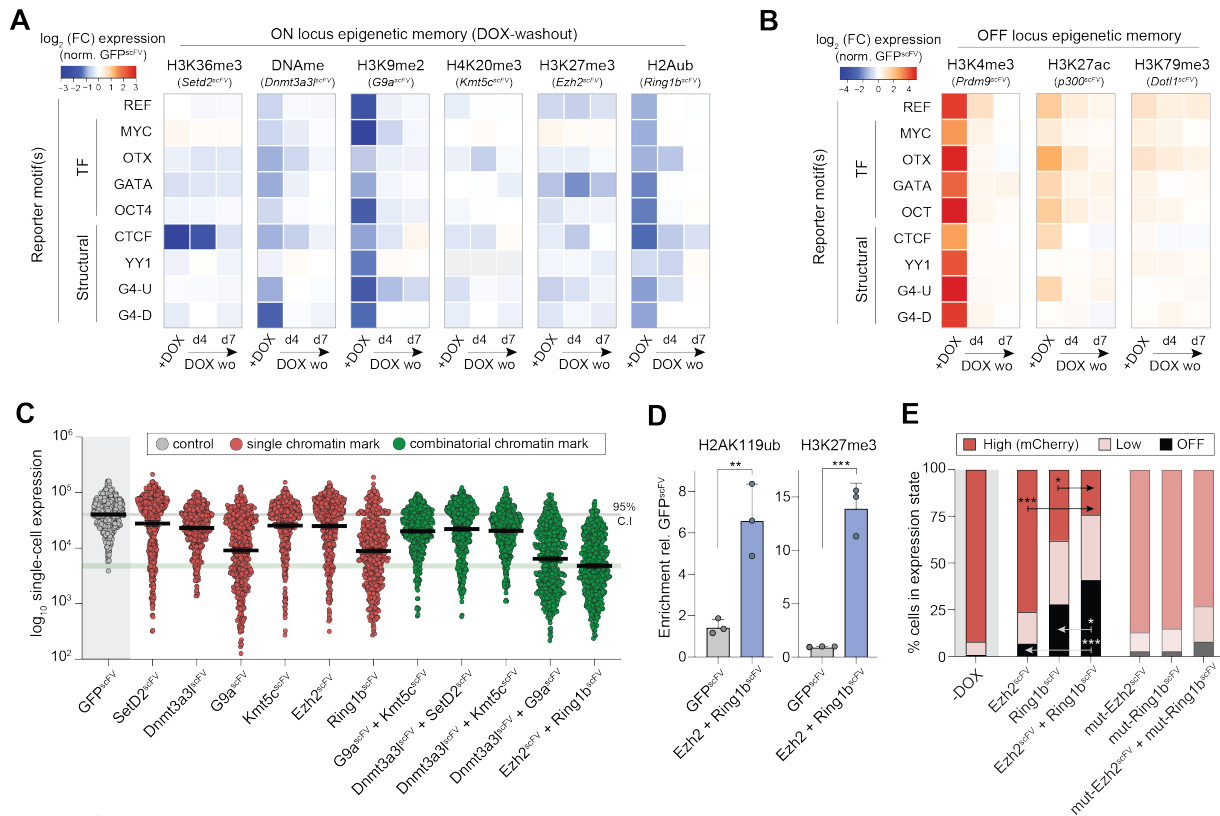

**Figure 6. Combinatorial epigenetic editing reveal a functional synergy between H3K27me3 and H2Aub.**

(A-B) Heat map showing the log<sub>2</sub> fold-change in transcription upon programming the indicated chromatin mark (x-axis) to the indicated motif reporter (y-axis), and then upon washout (DOX wo) for seven days to assay epigenetic memory. Shown are transcriptional persistence effects at (A) the ON locus and (B) the OFF locus. (C) Representative dot plots indicating log<sub>10</sub> expression after control GFP<sup>scFV</sup>, single CD<sup>scFV</sup> or multiplex CD<sup>scFV</sup> targeting for seven days to programme combinatorial marks. Each data point represents a single cell and bars denote geometric mean. (D) Bar plots showing enrichment of H2AK119ub (left) and H3K27me3 (right) on the ON Reference reporter assayed by CUT&RUN-qPCR following control GFP<sup>scFV</sup> or combinatorial *Ezh2*<sup>scFV</sup> + *Ring1b*<sup>scFV</sup> targeting. Shown is the mean of three biological replicates, error bars represent S.D, significance by unpaired t-test. E. Contingency plot indicating an elevated fraction of cells acquire the "OFF" expression state following combinatorial H3K27me3/H2AK119ub programming. Significance is calculated by two-way ANOVA \**P*<0.05 \*\**P*<0.01, \*\*\**P*<0.001.

440 provides an additional layer of context-dependency, and further uncovers the parameters that modulate  
441 the quantitative effects of chromatin modifications.

442

443

## 444 DISCUSSION

445

446 The extent to which specific chromatin modifications are causative or consequential of DNA-templated  
447 processes, and in which contexts, is an area of intense debate<sup>35,40</sup>. To address this, we developed a  
448 comprehensive epigenetic editing toolkit that enables *de novo* installation of a repertoire of nine key  
449 chromatin marks at precise genomic loci with high efficiency. We leverage this platform to capture that  
450 acquisition of each tested modification is sufficient to trigger at least some transcriptional response, in  
451 at least some contexts, with overall effects ranging from non-functional through to order-of-magnitude  
452 expression changes. The precise quantitative impact and single-cell penetrance of a mark is contingent  
453 on multiple contextual factors however, and we provide direct evidence that underlying TF motifs,  
454 genomic positioning and combinatorial modifications interact to modulate the overall expression  
455 output. Thus, whilst our data imply that chromatin marks have the potential to causally instruct  
456 transcription programmes, they also highlight they represent one regulatory layer within multiple  
457 nonlinear governing mechanisms.

458

459 Amongst our findings we charted a function for H3K4me3, which is an evolutionary conserved marker  
460 of transcriptionally active promoters, and directly recruits the preinitiation complex (PIC) via TAF3  
461 <sup>47,48</sup>. Nevertheless, loss-of-function studies across model systems suggest that H3K4me3 is not required  
462 for the majority of gene expression<sup>14,49,50</sup>. Indeed, recent studies have implied that promoter H3K4me3  
463 primarily reflects a consequence of transcription activity<sup>15</sup>. However, we report that *de novo* acquisition  
464 of H3K4me3 can instruct robust transcriptional upregulation from a subset of silent promoters. We  
465 confirm the direct effect of the mark *per se* using an array of different H3K4me3 programming tools,  
466 catalytic-mutant controls, and *Mll2<sup>CM/CM</sup>* ESC that specifically lack H3K4me3. The cumulative studies  
467 point toward a dual-feedback relationship whereby transcription itself promotes downstream  
468 accumulation of H3K4me3, but reciprocally, that *de novo* acquisition of H3K4me3 can trigger  
469 transcription. Indeed, H3K4me3 appears important for the timely activation of gene subsets during  
470 pluripotent state transition here, and in germline specification<sup>51</sup>.

471

472 Mechanistically, we find that programming H3K4me3 initiates an epigenetic cascade that includes  
473 extensive promoter acetylation, which is required for the functional impact of H3K4me3. This is likely  
474 reinforced, to some extent, by the transcription machinery having direct affinity for H3K4me3<sup>47,52</sup>.  
475 Nevertheless, it is important to note that H3K4me3 activity is contingent on appropriate TF in the  
476 cellular milieu and indeed, only a fraction (~35%) of silent genes responded to *de novo* H3K4me3. In  
477 this respect, acquisition of H3K4me3 may instruct transcriptional upregulation primarily by  
478 antagonising epigenetic repression, thereby establishing a permissive environment for relevant TF.  
479 Such a model is consistent with loss-of-function studies showing H3K4me3 depletion can be rescued  
480 by concomitant depletion of H3K27me3 and DNA methylation. Indeed, programming H3K4me3 here  
481 directly evicted H3K27me3, whilst concurrently driving H3K27ac enrichment. Notably, whilst we  
482 observed major gene upregulation (>50-fold) following *de novo* H3K4me3, previous studies have  
483 reported programming H3K4me3 either has subtle effects (typically <2-fold)<sup>26</sup>, or no measurable  
484 impact<sup>34</sup>. This difference may be rooted in the efficiency of H3K4me3 editing, with our optimised  
485 toolkit amplifying the magnitude, and particularly the genomic breadth, of *de novo* H3K4me3 domains.  
486 Indeed, gene expression levels are tightly correlated with both the intensity and breadth of promoter  
487 H3K4me3<sup>53</sup>, and we observed dose-dependent transcriptional responses to epigenetic editing. Taken

488 together, we propose that sufficient *de novo* H3K4me3 can antagonise extant repressive mechanisms  
489 and enable transcription initiation, if appropriate trans-acting factors are present.

490

491 Transcription factors sit at the apex of transcriptional regulation cascades, and therefore focus on the  
492 role of chromatin modifications has often fallen on how they directly or indirectly modulate TF activity.  
493 This is evident for DNA methylation for example, which impairs TF such as NRF1 and BANP from  
494 binding cognate sites<sup>54,55</sup>, and histone modifications, which can impede non-pioneer TF activity<sup>36,56</sup>.  
495 Less is understood about the reciprocal relationship, whereby TFs modulate the functional output of a  
496 chromatin modification. By quantifying the instructive potential of multiple marks, we were  
497 subsequently able to use reductionist strategy to dissect how underlying DNA sequence or TF motifs  
498 influence such chromatin function to tune outputs. For example, the presence of YY1 motifs limited  
499 the repressive potential of both H3K9me2/3 and polycomb marks, effectively conferring partial  
500 resistance to epigenetic silencing. Reciprocally, MYC/E-box motifs restricted activation by *de novo*  
501 H3K4me3 or H3K27ac. This reflects the activity of the PRC1.6 complex that occupies E-box motifs<sup>46</sup>,  
502 which in turn therefore act as genetically-encoded signals that threshold maximal activation. Such *cis*  
503 genetic x epigenetic interplays that shape the expression space could have implications for the  
504 evolutionary potential of gene regulatory networks<sup>57</sup>.

505

506 The most striking interaction entailed a switch-like behaviour of H3K36me3, which instructed strong  
507 reporter silencing only in the context of *cis* CTCF motifs. Such context-dependent H3K36me3 function  
508 could be linked with CTCF-mediated nucleosome phasing, 3D looping, direct transcription modulation  
509 and/or chromatin insulation<sup>43</sup>, which necessitates future study. More generally, understanding the bi-  
510 directional regulatory relationship(s) between the genome and epigenome is key towards deciphering  
511 how DNA sequence variants influence phenotypic traits<sup>58</sup>. For example, a given sequence variant that  
512 alters TF binding, thereby creating an expression quantitative trait locus (eQTL), may be unmasked or  
513 neutralized depending on the interactions with the overlying epigenetic modification(s). A further  
514 contextual parameter relates to the interplay between overlapping chromatin modifications. We find  
515 combinatorial H3K27me3 and H2AK119ub marks synergise to enhance the fraction of responsive cells,  
516 but not absolute repression. Such epigenetic ‘penetrance’ effects at the single-cell level also contributed  
517 to differential responses to singleplex epigenetic editing. This implies there is a equilibrium of  
518 regulatory forces at steady state, with programming of more influential (or combinatorial) marks having  
519 a greater, but not unequivocal, probability of overcoming the governing *status quo* in each cell.  
520 Importantly however, whilst our data imply that chromatin marks can be instructive, they also  
521 emphasize that impacts are context-dependent. This argues against a hard-wired ‘histone code’ whereby  
522 specific patterns of chromatin marks elicit a specific output, and instead points toward a nonlinear  
523 regulatory network that produces quantitative outputs depending on myriad inputs including TF  
524 binding, chromatin architecture, *cis* genetics, metabolic state, and indeed epigenetic modifications  
525 themselves.

526

527 In summary, our study captures the principles of how *de novo* chromatin modifications can causally  
528 influence gene expression across contexts. Moreover, the modular epigenetic editing toolkit provides a  
529 framework to explore regulatory mechanisms across DNA-templated processes, and to precisely  
530 manipulate chromatin for desirable responses in disease models.

## 531 METHODS & MATERIALS

532

### 533 Cell culture

534 Wildtype mouse embryonic stem cells (mESCs) were derived freshly (mixed 129/B6, XY) and cultured  
535 on gelatin-coated cell culture plates under naïve conditions (2i/LIF). Routine passaging was performed  
536 in N2B27 basal culture medium (NDIFF, Takara #y40002), supplemented with 1  $\mu$ M PD0325901 and  
537 3  $\mu$ M CHIR99021 (both from Axon Medchem), 1,000 U/ml leukaemia inhibitory factor (LIF; in house  
538 production), 1% FBS (Millipore) and 1% penicillin/streptomycin (Gibco). All culture media was  
539 filtered through a 0.22 $\mu$ m pore Stericup vacuum filtration system (Millipore). Cells were maintained at  
540 37°C in a 5% CO<sub>2</sub> humidified atmosphere and were passaged every 2 days by dissociation with TrypLE  
541 (Thermo Fisher Scientific). Culture media was replaced with fresh stocks daily. Mycoplasma  
542 contamination was tested routinely by ultrasensitive qPCR assay (Eurofins).

543

### 544 Generation of reporter cell lines

545 We designed a Reference reporter to provide a baseline context, and to enable the influence of  
546 subsequently inserting sequence motifs or variants to be assessed. We used the endogenous EF1 $\alpha$  core  
547 promoter (~200bp) embedded into a DNA sequence context selected from human chromosome 7  
548 (chr7:41344065-41346105, GRCh38/hg38) to be neutral in respect of genomic features, including:  
549 depleted of transcription factor motifs, GC percentage (50%), lacking retrotransposons, and without  
550 epigenetic enrichments. The resulting cassette (~3kb) was designed as a gBlock gene fragment from  
551 Integrated DNA Technologies (IDT), and amplified by PCR using Q5 hot start high-fidelity polymerase  
552 (NEB #M0494S) and primers with appropriate overhangs. This was inserted by In-fusion HD-Cloning  
553 into a recipient vector upstream of a Kozak sequence, the mCherry2-H2B fluorescence coding  
554 sequence, and a poly-A motif. The assembled reporter construct (DNA::EF1 $\alpha$  Pr::DNA::mCherry2-  
555 H2B::pA) was sequence-verified, and then PCR amplified with Q5 polymerase, using ultramer DNA  
556 oligos (Eurofins) carrying 200bp-long overhangs homologous to DNA sequences flanking the desired  
557 genomic insertion site(s). Specifically, we chose two intergenic genomic insertion sites that  
558 differentially support transcription. Firstly, a permissive landing site (chr9:21545329; ON locus,  
559 TIGRE) and secondly a non-permissive landing site that only supports weak transcription  
560 (chr13:45253722; OFF locus), albeit within a euchromatic domain.

561

562 To insert the cassettes into each locus, we transfected 1 $\mu$ g of PCR-amplified dsDNA reporter into naïve  
563 mESCs together with spCas9 plasmid pX459 (*Addgene #62988*), carrying a single gRNA  
564 complementary to the genomic integration site. After puromycin selection (1.2 $\mu$ g/ml) for transient  
565 px459 transfection (2 days), mCherry2 positive cells that were candidates for correct insertion were  
566 purified by fluorescence-activated cell sorting (FACS). Single clones were expanded and correct mono-  
567 allelic (hemizygous) integration of the reporter was verified by PCR genotyping and Sanger Sequencing  
568 (Azenta). The full allelic series of reporter variants, which each comprised the same baseline sequence  
569 as the Reference, but with insertion of several discrete transcription factor or structural motifs (see  
570 Supplementary materials for more info) were also ordered as gBlock Gene Fragments from IDT.  
571 Generation of the complete reporter cassette and genomic integration was carried out as described above  
572 for the Reference to generate a total of eighteen independent reporter lines (nine reporter variants in  
573 two genomic locations), each with independent clones. We validated independent insertions of each  
574 reporter to confirm reproducibility.

575

576

577

## 578 **Generation of epigenetic editing toolkit constructs**

579 Epigenetic editing tools comprising a nuclease dead (d)Cas9<sup>GCN4</sup> and the catalytic core of chromatin-  
580 modifying enzymes were cloned into PiggyBac recipient plasmids by homology arm recombination  
581 using In-fusion HD cloning (Takara #639650). Specifically, the *Streptococcus Pyogenes* dCas9<sup>GCN4</sup> was  
582 PCR amplified from the PlatTET-gRNA2 plasmid <sup>37</sup> (Addgene #82559), and sub-cloned under the  
583 control of a DOX-inducible TRE-3G promoter into a PiggyBac backbone. The vector also carries the  
584 TET-ON 3G transactivator and hygromycin resistance.

585  
586 For all chromatin-modifying ‘effector’ plasmids, the scFV domain and a superfolder (sf)GFP coding  
587 sequence were amplified from the PlatTET-gRNA2 plasmid (Addgene #82559) and fused in frame with  
588 the catalytic domain (CD) or the full-length (FL) of mouse *Prdm9*, *P300*, *Dot1L*, *G9a*, *Kmt5c*, *Setd2*,  
589 *Ezh2* and *Ring1b*, all amplified from early passage ESC cDNA. *Dnmt3a* CD and the C-terminal part of  
590 mouse *Dnmt3L* (3a3L) were amplified from pET28-Dnmt3a3L-sc27 (Addgene #71827). The resulting  
591 constructs (collectively: CD<sup>scFV</sup>) were cloned in PiggyBac recipient vectors under the control of the  
592 TRE-3G promoter. These vectors also carry constitutive expression of a Neomycin resistance gene. The  
593 control GFP<sup>scFV</sup> effector was cloned as described above but lacks any chromatin modifying domain.  
594 Finally, catalytic mutant (mut-CD<sup>scFV</sup>) effectors were also cloned as described above. Specific  
595 mutations that abolish the catalytic activity of each CD<sup>scFV</sup> but that retain protein stability were  
596 introduced during PCR amplification with oligonucleotide primers designed with precisely mismatched  
597 nucleotides. The catalytically-inactivating point mutations introduced in each CD<sup>scFV</sup> are: *Prdm9*,  
598 G282A; *p300*, D1398Y; *Dot1L*, GS163-164RC; *Setd2*, R1599C; *Dnmt3a* C706S; *G9a*, Y1207del;  
599 *Kmt5c*, NHDC182-185AAAG; *Ezh2*, Y726D; *Ring1b*, I53S; *Set1a*, S163I.

600  
601 The guide RNA plasmid, carrying an enhanced gRNA scaffold <sup>39</sup>, was amplified from Addgene plasmid  
602 #60955 and cloned into a PiggyBac recipient vector, which also constitutively expressed puromycin  
603 resistance and TagBFP. All gRNAs used to target the epigenetic editing system were designed using  
604 the GPP web portal (Broad Institute). gRNA forward and reverse strands carrying appropriate  
605 overhangs (10 μM final concentration) were annealed in buffer containing 10 mM Tris, pH 7.5–8.0,  
606 60 mM NaCl, 1 mM EDTA, at 95°C for 3 min and allowed to cool down at RT for > 30 min. Annealed  
607 gRNAs were ligated with T4-DNA ligase (NEB #M0202S) for 1 h at 37°C into the PiggyBac recipient  
608 vector previously digested with *BlnI* (NEB #R0585S) and *BstXI* (NEB #R0113S) restriction enzymes.  
609 Final plasmids were amplified by bacteria transformation and purified by endotoxin-free midi-  
610 preparations (ZymoResearch #D4200). Correct assembly and sequences were confirmed by Sanger  
611 sequencing (Azenta).

## 612 **Epigenetic editing assays**

613  
614 For stable integration of the epigenetic editing system, mESC lines were co-transfected with dCas9<sup>GCN4</sup>,  
615 one or more CD<sup>scFV</sup> (or control GFP<sup>scFV</sup>), and gRNA plasmids in addition to the PiggyBac transposase  
616 vector using 10:20:2:1 molar ratio, respectively. Cells with successful integration of all three constructs  
617 were enriched by successive antibiotic selection with hygromycin (250 μg/ml) for 5 days, neomycin  
618 (300 μg/ml) for 5 days and puromycin (1.2 μg/ml) for 2 days. After allowing cells to recover and  
619 expand, expression of dCas9<sup>GCN4</sup> and CD<sup>scFV</sup> was induced by supplementing the culture media with  
620 doxycycline (DOX) (100 ng/ml) for either 2 or 7 days, with the exception of p300-CD<sup>scFV</sup>, whereby we  
621 used 5ng/ml DOX to mitigate against OFF-targeting. Correct induction of all epigenetic editing  
622 components results in double GFP and BFP positive cells (GFP+; BFP+). Activity of endogenous target  
623 genes or reporter (mCherry2) was analysed by quantitative PCR or quantitative flow cytometry, by  
624 sorting/gating for analysis only GFP+; BFP+ cells, which have correctly induced the editing system  
625 (typically >75% cells). For experiments employing the p300 inhibitor A485, cells were stimulated with

626 100ng/ml DOX for 3 days and, in parallel treated with 3 $\mu$ M A485 (Cayman Chemical, #24119). Where  
627 indicated 1 $\mu$ M 5-azacytidine (AZA, from Sigma-Aldrich) was included in media and replaced daily for  
628 3 days in a row.

629

630 For epigenetic memory experiments, cells were washed thoroughly with PBS, and subsequently  
631 cultured in the absence of DOX, which led to a rapid downregulation of the epigenetic editing  
632 machinery (GFP<sup>-</sup>). Memory of reporter expression changes was quantified by flow cytometry after 4  
633 or 7 days of DOX washout (DOXwo) in cells that were confirmed to have fully switched off the  
634 epigenetic editing tool (BFP<sup>+</sup>/GFP<sup>-</sup> cells; typically >99%).

635

### 636 **Transfection**

637 DNA transfection was performed with Lipofectamine 3000 (Thermo Fisher Scientific #L30000015).  
638 Cells were seeded one day in advance so as to reach ~60% confluency on the day of transfection.  
639 Appropriate amounts of DNA were calculated according to manufacturer's instructions. Media were  
640 changed after 8 h, and replaced with fresh antibiotic containing medium.

641

### 642 **Generation of genetically edited ESC lines**

643 Knockouts (KO) cell lines for *Pcgf6* and *Myc* were generated by means of CRISPR/Cas9 genome  
644 editing. Specifically for each target gene, two plasmids (pX459) were transiently transfected into low-  
645 passage wild-type ESCs that had previously been engineered to carry a specific knock-in reporter. Each  
646 plasmid expressed one of two gRNAs targeting the flanking introns of a critical coding exon in the gene  
647 of interest (*c-Myc*, *Pcgf6*) (see table of gRNAs) and Cas9. Critical exons were present within all known  
648 isoforms and gRNAs were designed with the goal of specifically deleting the entire exon. After  
649 transfection, cells were selected with puromycin (1.2  $\mu$ g/ml) for 3 days and subsequently seeded at low  
650 density (1,000 cells per 10cm<sup>2</sup>) for single clone isolation. Following expansion, single clones were  
651 screened for homozygous genetic editing by PCR genotyping (see table of primers) and dual loss-of-  
652 function (frameshifted) alleles were confirmed by Sanger sequencing (Genewiz). For generation of  
653 precision edited catalytic-mutant *Mil2* (*Mil2*<sup>CM/CM</sup>) lines, homozygous ESC were freshly derived from  
654 heterozygous FVB crosses carrying an *Mil2* Y2602A mutant allele.

655

### 656 **Flow cytometry**

657 Cells were washed with PBS and gently dissociated into single-cell suspension using TrypLE, followed  
658 by resuspension in FACS buffer comprised of PBS with 1% FBS, and filtered through a 40 $\mu$ m cell  
659 strainer (BD, cup-Filcons #340632). A FACS Aria III (Becton Dickinson) or Attune NxT Flow  
660 Cytometer (Thermo Fisher Scientific) were used for sorting or analysis, respectively. 96-well plates  
661 containing the different combinations of reporter x epigenetic effector cell lines were analyzed using  
662 the Attune NxT Flow Cytometer Autosampler and resulting data was used to generate the heat maps  
663 shown in Fig. 4C and 5A. Alternatively, specific reporter x epigenetic effector cell lines were generated  
664 and cultured in 12 well plates and samples were analyzed one by one using the single sample line of  
665 the Attune NxT Flow Cytometer. Flow cytometry data analysis was performed with FlowJo v10.5.3  
666 (Tree Star, Inc.).

667

668 To generate dot plots shown in this study, the FlowJo software was used first to gate for live cells and  
669 then for cells expressing all epigenetic editing components (GFP<sup>+</sup>; BFP<sup>+</sup>). The resulting population was  
670 randomly down-sampled to 1000 cells. The mCherry2 scaled fluorescent values corresponding to the  
671 relative expression intensities for each cell were exported, and imported into Prism GraphPad statistical  
672 software. Dot plots were constructed with the geometric mean of the raw data shown (black bar). For  
673 dot plots representative of the individual reporter expression, prior to transfection of the editing

674 machinery (Fig 4B), analysis was performed as described above, except that no GFP<sup>+</sup>; BFP<sup>+</sup> gating was  
675 performed and mCherry2 single cell values were obtained from the whole population of live cells. To  
676 generate histograms, the parental GFP<sup>+</sup>; BFP<sup>+</sup> cell population was selected as above and the frequency  
677 distribution of the flow data was plotted versus mCherry2 fluorescence intensity using a log<sub>10</sub> scale.  
678 The bisector gating tool was then used to split histograms in two sectors corresponding to mCherry2  
679 ON expression state and mCherry2 OFF expression state, based on negative and positive controls.  
680 Alternatively, the ranged gate tool was used to split the histogram in three sectors corresponding to  
681 mCherry2 “high”, mCherry2 “low” and mCherry2 “OFF” expression states. Identical gates were  
682 applied to all samples within an experiment.

683

684 Finally, to generate the heat maps, the mCherry2 scaled fluorescent values for 1000 GFP<sup>+</sup>; BFP<sup>+</sup> cells  
685 were obtained and the geometric mean for each sample (indicating reporter expression after GFP<sup>scFV</sup> or  
686 specific CD<sup>scFV</sup> effector targeting) was calculated. The geometric mean of each CD<sup>scFV</sup> effector was  
687 normalized against the corresponding geometric mean of GFP<sup>scFV</sup> to obtain the fold change of reporter  
688 expression following epigenetic editing (geometric mean CD<sup>scFV</sup> effector/geometric mean GFP<sup>scFV</sup>).  
689 The normalised geometric mean values coming from four technical replicates of the experiments were  
690 averaged and log<sub>2</sub> transformed. Log<sub>2</sub> fold-change values were plotted in R.

691

### 692 **RNA extraction, library preparation and sequencing**

693 Total RNA was extracted from cells using the Monarch Total RNA Miniprep Kit (NEB #T2010),  
694 following manufacturer instructions. Purified RNA was quantitated with a Qubit Fluorometer (Thermo  
695 Fisher Scientific) and quality checked with an automated electrophoresis system (Agilent Tape Station  
696 system) to ensure RNA integrity (RIN >9). Precisely 1µg of each RNA sample was used to prepare  
697 sequencing libraries using the NEBNext Ultra II directional RNA library kit by the EMBL Genomics  
698 facility. Libraries were sequenced on the Nextseq Illumina sequencing system (paired-end 40  
699 sequencing). Raw Fastq reads were trimmed to remove adaptors with TrimGalore (0.4.3.1, -phred33–  
700 quality 20–stringency 1 -e 0.1–length 20), quality checked and aligned to the mouse mm10 (GRCm38)  
701 genome using RNA Star (2.5.2b-0, default parameters except for–outFilterMultimapNmax 1000).  
702 Analysis of the mapped sequences was performed using Seqmonk software (Babraham bioinformatics,  
703 v1.47.0) to generate log<sub>2</sub> reads per million (RPM) or gene length-adjusted (reads per kilobase million,  
704 RPKM) gene expression values. Differentially expressed genes (DEG) were determined using the  
705 DESeq2 package (v.1.24.0), inputting raw strand-specific mapping counts and applying a multiple-  
706 testing adjusted (FDR)  $P < 0.05$  significance threshold, and log<sub>2</sub> fold-change filter where indicated.

707

### 708 **RT-qPCR**

709 Total RNA was extracted from cells using the Monarch Total RNA Miniprep Kit (NEB #T2010),  
710 following manufacturer instructions. After quantification using a Qubit Fluorometer (Thermo Fisher  
711 Scientific), 1µg of each sample was DNAase treatment, and inputted into cDNA synthesis by incubation  
712 with a mixture of random hexamers and reverse transcriptase (TAKARA PrimeScript RT Reagent Kit  
713 with gDNA Eraser, Takara Bio #RR047A). The resulting cDNA was diluted 1:10 and 2 µl of each  
714 sample was amplified using a QuantStudio 5 (Applied Biosystems) thermal cycler, employing the  
715 SYgreen Blue Mix (PCRbio) and pre-validated gene-specific primers that span exon-exon junctions.  
716 Results were analyzed using 2–ΔΔCt (relative quantitation) with the QuantStudio 5 software and  
717 normalized to the housekeeping gene *Rplp0*.

718

### 719 **Bisulphite pyrosequencing**

720 DNA bisulfite conversion was performed starting from a maximum of 1 × 10<sup>5</sup> pelleted cells per sample  
721 using the EZ DNA Methylation-Direct kit (Zymo Research #D5021), and following the manufacturer’s



722 instructions. Target genomic regions were amplified by PCR using 1µl of bisulfite-converted DNA and  
723 specific primer pairs, one of which is biotin-conjugated, using the PyroMark PCR kit (Qiagen #978703).  
724 10µl of the PCR reaction was used for sequencing using the dispensation orders (below) generated by  
725 the PyroMark Q24 Advanced 3.0 software, along with PyroMark Q24 advanced reagents (Qiagen,  
726 #970902) according to manufacturer's instructions. Briefly, the PCR reaction was mixed with  
727 streptavidin beads (GE Healthcare #17-5113-01) and binding buffer, denatured with denaturation  
728 buffer using a PyroMark workstation (Qiagen) and released into a PyroMark Q24 plate (Qiagen) pre-  
729 loaded with 0.3µM of sequencing primer. Annealing of the sequencing primer to the single-strand PCR  
730 template was achieved by heating at 80°C for 2 min and cooling down at RT for 5 min. Pyrosequencing  
731 was run on PyroMark Q24 advanced pyrosequencer (Qiagen). Results were analysed with PyroMark  
732 Q24 Advanced 3.0 software.

733

734 Dispensation orders

735 *Reference reporter:*

736 AGTGATCGTATACTAGTATAGAGATGTCGTGTAGTCTGTAGTGTAGATGTCGTATGATCG  
737 TATATGTTCTGA

738 *Col16a1:*

739 ATCATCGATCTATCTCTACTAGTACATCGACATCGATATCGATCGACACACTCACATCGA  
740 CTACTACAACTATCAGATCGACC

741 *Hand1:*

742 CACTACGATAGCACTATCGACACATCATCACATCATCACACTCACATCGATCGACACCAT  
743 ACTCATCAGACTC

744

#### 745 **CUT&RUN**

746 The CUT&RUN (Cleavage Under Targets and Release Using Nuclease) protocol<sup>59</sup> was used to detect  
747 genomic enrichment of histone modifications. From 1x10<sup>5</sup> to 1x10<sup>6</sup> cells (depending on the selected  
748 antibody) were pelleted at 300g for 3 min following flow sorting. Cells were washed twice in Wash  
749 buffer (1 ml 1 M HEPES pH 7.5, 1.5 ml 5 M NaCl, 12.5 µL 2 M Spermidine, final volume brought to  
750 50 ml with dH<sub>2</sub>O, complemented with one Roche Complete Protease Inhibitor EDTA-Free tablet).  
751 Pellets were then re-suspended in 1 ml of Wash Buffer and 10 µL of concanavalin beads (Bangs  
752 Laboratories #BP531-3ml) in 1.5ml Eppendorf tubes and allowed to rotate at RT for 10 min.  
753 Supernatant was removed by placing the samples on a magnet stand and 300µl of Antibody buffer  
754 (Wash buffer supplemented with 0.02% Digitonin and 2mM EDTA) containing 0.5-3 µg of target-  
755 specific antibody was added. Samples were left to rotate overnight at 4°C. Antibodies used were: Rabbit  
756 anti-H3K4me3 (Diagenode Cat#C15410003), Rabbit anti-H3K27me3 (Millipore Cat#07-449), Rabbit  
757 anti-H3K9me3 (Abcam Cat#ab8898), Rabbit anti-H2Aub (Lys119) (CST Cat#8240), Rabbit anti-  
758 H3K36me3 (Diagenode Cat#C15410192), Rabbit anti-H3K36me3 (Active Motif Cat#61101), Rabbit  
759 anti-H3K27ac (Active Motif Cat#39133), Rabbit anti-H3K79me2 (Abcam Cat#ab3594), Rabbit anti-  
760 H4K20me3 (Abcam, Cat#ab9053)

761

762 The following day, each tube was placed on a magnetic stand and cell-bead complexes were washed  
763 twice with cold Dig-wash buffer (Wash buffer containing 0.02% Digitonin), then re-suspended in 300µl  
764 of cold Dig-wash buffer supplemented with 700 ng/ml of purified protein-A::MNase fusion (pA-  
765 MNase). Samples were left to rotate on a rotor at 4°C for 1 h. After two washes in cold Dig-wash buffer  
766 cell-bead complexes were re-suspended gently in 50 µl of Dig-wash buffer and placed on an aluminium  
767 cooling rack on ice to be precooled to 0°C. To initiate pA-MNase digestion, 2 µl of 100 mM CaCl<sub>2</sub> was  
768 added, samples were flicked to mix and immediately returned to the cooling rack. Digestion was  
769 allowed to proceed for 30 min and was then stopped by addition of 50 µl 2XSTOP buffer (340 mM

770 NaCl, 20 mM EDTA, 4 mM EGTA, 0.02% digitonin, 250 µg of RNase A, 250 µg of glycogen). Samples  
771 were incubated at 37 °C for 10 min to release CUT&RUN fragments from the insoluble nuclear  
772 chromatin and centrifugated at 16,000g for 5 min at 4°C. The supernatant was isolated by means of a  
773 magnetic stand and transferred into a new tube while the cell-bead complexes were discarded. 2µl of  
774 10% SDS and 2.5 µl of Proteinase K was added and the samples were incubated for 10 min at 70°C.  
775 Purification and size selection of DNA were performed using SPRI beads (Beckman Coulter #B23318)  
776 following the manufacturer's instruction for double size selection with 0.5× and 1.3× bead volume-to-  
777 sample volume ratio. Purified DNA was eluted in 30 µl of Ultrapure water.

778  
779 For analysis of specific genomic targets, CUT&RUN DNA fragments were subjected to quantitative  
780 qPCR analysis. A 1:10 dilution was performed and 2µl of diluted DNA was amplified by mean of a  
781 QuantStudio 5 (Applied Biosystems) thermal cycler using the SYgreen Blue Mix (PCRbio) and specific  
782 primers for both targeted and control genomic regions. Relative abundance of histone marks was  
783 determined by calculating the  $2^{-Ct}$  value for each genomic region of interest and normalizing it against  
784 the  $2^{-Ct}$  value of a positive control genomic locus ( $2^{-Ct}$  targeted region/ $2^{-Ct}$  positive control  
785 region). Data is then shown as relative fold change between experimental samples and control samples  
786 (e.g. CD<sup>scFV</sup> over GFP<sup>scFV</sup>) with a randomly selected control replicate set as the baseline (=1).

787  
788 For genome-wide analysis, CUT&RUN was performed as described above followed by library  
789 preparation. Specifically, eluted DNA fragments were purified and subject to size selection of DNA  
790 using SPRI beads (Beckman Coulter #B23318) following the manufacturer's instruction for double size  
791 selection with 0.5× and 1.3× bead volume-to-sample volume ratio. Purified DNA was eluted in 30 µl  
792 of Ultrapure water and 10ng was inputted into the NEBNext Ultra II DNA Library Prep Kit for Illumina  
793 (NEB #E7645S) using the following PCR programme: 98°C 30 s, 98°C 10 s, 65°C 10 s and 65°C 5 min,  
794 steps 2 and 3 repeated for 12–14 cycles. After quantification and quality check with an automated  
795 electrophoresis system (Agilent Tape Station system), library samples were sequenced on the Nextseq  
796 Illumina sequencing system (paired-end 40 sequencing). Raw Fastq sequences were trimmed to remove  
797 adaptors with TrimGalore (v0.4.3.1, -phred33 --quality 20 --stringency 1 -e 0.1 --length 20), quality  
798 checked and aligned to the mouse mm10 genome with the inserted mCherry reporter using Bowtie2  
799 (v2.3.4.2, -I 50 -X 800 --fr -N 0 -L 22 -i 'S,1,1.15' --n-ceil 'L,0,0.15' --dpad 15 --gbar 4 --end-to-end --  
800 score-min 'L,-0.6,-0.6'). Analysis of the mapped sequences was performed using seqmonk software  
801 (Babraham bioinformatics, v1.47.0) by enrichment quantification of the normalised reads. To identify  
802 promoters with H3K4me3 change in *Mil2*<sup>CM/CM</sup>, a 1kb window centered on the TSS was quantified  
803 amongst replicates and a normalised log fold-change (FC) filter applied between samples. Metaplots  
804 over genomic features were constructed by quantifying 100bp bins centered on the features of interest  
805 and normalised cumulative enrichments plotted.

806

### 807 **Chromatin immunoprecipitation-qPCR**

808  $3 \times 10^6$  cells were dissociated with TrypLE, resuspended in PBS and pelleted at 200g for 4 min at RT.  
809 After, PBS was removed and cell pellet was fixed in 1ml of 1% PFA for 10 min at RT, followed by  
810 centrifugation at 200g for 4 min. The supernatant was discarded and fixation was quenched by addition  
811 of 1ml 0.125 M glycine for 5 min at RT. Glycine was removed and pellets were washed twice with cold  
812 PBS. Samples were kept on ice from this stage onwards. Cells were resuspended in 1ml of cold Lysis  
813 buffer (50 mM HEPES pH 8.0; 140 mM NaCl; 1 mM EDTA; 10% glycerol; 0.5% NP40; 0.25% Triton  
814 × 100), incubated on ice for 5 min and subsequently spun down at 1200g for 5 min at 4°C. One wash  
815 in Rinse buffer (10 mM Tris pH 8.0; 1 mM EDTA; 0.5 mM EGTA; 200 mM NaCl) was performed,  
816 followed by another centrifugation at 1200g for 5 min at 4°C. Cell nuclei were then resuspended in 900  
817 µl of Shearing buffer (0.1% SDS, 1 mM EDTA pH 8.0, and 10 mM Tris pH 8.0), transferred in a Covaris

818 milliTUBE 1 ml AFA Fiber (Covaris #520135) and sonicated for 12 min using a Covaris ultrasonicator  
819 at 5% duty cycle, 140 PIP, and 200 cycles per burst. The sonication cycle was repeated twice. Sonicated  
820 chromatin was spun down at 10,000g for 5 min at 4°C, the supernatant was collected and moved to a  
821 new tube. 20 µl of chromatin was taken to analyze appropriate chromatin shearing on a 1% agarose gel,  
822 while 1/10 of the total volume (~90 µl) was topped up with 5× IP buffer (250 mM HEPES, 1.5 M NaCl,  
823 5 mM EDTA pH 8.0, 5% Triton X-100, 0.5% DOC, and 0.5% SDS) and frozen down at -20°C for total  
824 input analysis. The remaining chromatin was topped up to 1ml with 5× IP buffer, then 30 µl of protein  
825 A/G Magnetic Beads (Thermo Fischer Scientific #88802) and 3µg of antibody were added to each tube  
826 and samples were left to rotate overnight at 4°C.

827

828 The following day, beads were washed in 1ml of 1× IP buffer by constant rotation at 4°C for 10 min.  
829 This step was repeated twice. Two more washes were performed: the first one in DOC buffer (10 mM  
830 Tris pH 8; 0.25 M LiCl; 0.5% NP40; 0.5% DOC; 1 mM EDTA) and the second one in 1x TE buffer.  
831 Then, beads were re-suspended in 100 µl of freshly prepared Elution buffer (1% SDS, 0.1M NaHCO<sub>3</sub>)  
832 and agitated constantly on a vortex for 15 min at RT. The eluted chromatin was transferred to a new  
833 tube, and elution was repeated again as before by adding 50 µl of Elution buffer to the beads. The eluted  
834 chromatin was combined. Finally, 10 µl of 5M NaCl was added to the eluted chromatin as well as to  
835 the thawed total input tubes. Samples were incubated overnight at 65°C in a water bath. The next day,  
836 the DNA was purified using the Zymo Genomic DNA clean and concentrator kit (Zymo Research  
837 #D4011) and eluted in 30 µl of Ultrapure water. For qPCR analysis, samples were handled as described  
838 above for CUT&RUN-qPCR. Specifically, a 1:10 dilution was performed and 2 µl of diluted DNA was  
839 amplified by means of a QuantStudio 5 (Applied Biosystems) thermal cycler using the SYgreen Blue  
840 Mix (PCRbio) and specific primers for both targeted and control genomic regions. Relative abundance  
841 of histone marks was determined by using the “percent input” method (the 2<sup>-Ct</sup> values obtained from  
842 the ChiP samples were divided by the 2<sup>-Ct</sup> values of the input samples). Data is then shown as relative  
843 fold change between experimental samples and control samples (e.g. CD<sup>scFV</sup> over GFP<sup>scFV</sup>).

844

#### 845 **ATAC-seq**

846 Cells were initially treated in culture medium with 200 U/ml of DNaseI for 30 min at 37°C to digest  
847 degraded DNA released from dead cells, and then harvested. Cells were then washed five times in PBS,  
848 dissociated with TrpLE and counted. 5 × 10<sup>4</sup> cells were pelleted at 500g at 4°C for 5 min. The  
849 supernatant was removed and cell pellet was resuspended in 50 µl of cold ATAC Resuspension buffer  
850 (10 mM Tris-HCl pH7.4, 10 mM NaCl, 3 mM MgCl<sub>2</sub>, supplemented with 0.1% NP40, 0.1% Tween20  
851 and 0.01% digitonin), followed by incubation on ice for 3 min. Lysis was stopped by washing with 1ml  
852 of cold ATAC Resuspension buffer supplemented with 0.1% Tween20 only. Nuclei were pelleted at  
853 500g for 10 min at 4°C. The supernatant was removed and the nuclei were resuspended in 50 µl of  
854 transposition mixture (25 µl 2xTD buffer, 2.5 µl transposase from the Illumina Tagment DNA Enzyme  
855 and Buffer Kit #20034197, 16.5 µl PBS1x, 0.5 µl 1% digitonin, 0.5 µl 10% tween20 and 5 µl H<sub>2</sub>O).  
856 Samples were incubated at at 37°C for 30 min in a thermomixer while shaking at 1,000 RPM. Next, the  
857 DNA was purified using the Zymo Genomic DNA clean and concentrator kit (Zymo Research #D4011)  
858 and eluted in 21 µl of elution buffer. 20 µl was used for PCR amplification using Q5 hot start high-  
859 fidelity polymerase (NEB #M0494S) and a unique combination of the dual-barcoded primers P5 and  
860 P7 Nextera XT Index kit (Illumina #15055293). The cycling conditions were: 98°C for 30 s; 98°C for  
861 10 s; 63°C for 30 s; 72°C for 1 min; 72°C for 5 min, repeated for five cycles. After, 5 µl of the pre-  
862 amplified mixture was used to determine additional cycles by qPCR amplification using SYgreen Blue  
863 Mix (PCRbio) and the P5 and P7 primers selected above in a QuantStudio 5 (Applied Biosystems)  
864 thermal cycler. The number of additional PCR cycles to be performed was determined by plotting linear  
865 Rn versus cycle and by identifying the cycle number that corresponds to one-third of the maximum

866 fluorescent intensity (Buenrostro et al. 2015). The determined extra PCR cycles were performed by  
867 placing the pre-amplified reaction back in the thermal cycler. Finally, clean-up of the amplified library  
868 was performed using again the DNA clean and concentration kit (Zymo #D4014) and the DNA was  
869 eluted in 20  $\mu$ l of H<sub>2</sub>O. After quantification and quality check with an automated electrophoresis system  
870 (Agilent Tape Station system), library samples were pooled together and sequenced on the Nextseq  
871 Illumina sequencing system (paired-end 40 sequencing). Following sequencing, raw reads were first  
872 trimmed with TrimGalore (v0.4.3.1, reads > 20 bp and quality > 30) and then quality checked with  
873 FastQC (v0.72). The resulting reads were aligned to custom mouse mm10 genome containing the  
874 reporter using Bowtie2 (v2.3.4.3, paired-end settings, fragment size 0-1,000, --fr, allow mate  
875 dovetailing). Aligned sequences were then analysed with seqmonk (Babraham bioinformatics, v1.47.0)  
876 by performing enrichment quantification of the normalised reads.

877

### 878 **Statistical analysis**

879 Details on all statistical analysis used in this paper, including the statistical tests used, the number of  
880 replicates and precision measures, are indicated in the corresponding figure legends. Statistical analysis  
881 of replicate data was performed using appropriate strategies in Prism GraphPad statistical software  
882 (v8.4.3), with the following significance designations: n.s  $P > 0.05$ , \*  $P \leq 0.05$ , \*\*  $P \leq 0.01$ , \*\*\*  $P \leq$   
883  $0.001$ .

884

### 885 **Data Accessibility**

886 All data derived from next generation sequencing assays have been deposited in the publically available  
887 ArrayExpress database under the accession codes E-MTAB-12103, E-MTAB-12101, E-MTAB-12100.

888

889

890

891

892

893

894

895

896

897

898

899

900

901

902

903 **REFERENCES**

904

- 905 1. Kouzarides, T. Chromatin modifications and their function. *Cell* **128**, 693-705 (2007).
- 906 2. Blackledge, N.P. & Klose, R.J. The molecular principles of gene regulation by Polycomb  
907 repressive complexes. *Nat Rev Mol Cell Biol* **22**, 815-833 (2021).
- 908 3. Allshire, R.C. & Madhani, H.D. Ten principles of heterochromatin formation and function. *Nat*  
909 *Rev Mol Cell Biol* **19**, 229-244 (2018).
- 910 4. Cavalli, G. & Heard, E. Advances in epigenetics link genetics to the environment and disease.  
911 *Nature* **571**, 489-499 (2019).
- 912 5. Grosswendt, S. *et al.* Epigenetic regulator function through mouse gastrulation. *Nature* **584**,  
913 102-108 (2020).
- 914 6. Weinberg, D.N. *et al.* The histone mark H3K36me2 recruits DNMT3A and shapes the  
915 intergenic DNA methylation landscape. *Nature* **573**, 281-286 (2019).
- 916 7. Barski, A. *et al.* High-resolution profiling of histone methylations in the human genome. *Cell*  
917 **129**, 823-37 (2007).
- 918 8. Consortium, E.P. An integrated encyclopedia of DNA elements in the human genome. *Nature*  
919 **489**, 57-74 (2012).
- 920 9. Roadmap Epigenomics, C. *et al.* Integrative analysis of 111 reference human epigenomes.  
921 *Nature* **518**, 317-30 (2015).
- 922 10. Gorkin, D.U. *et al.* An atlas of dynamic chromatin landscapes in mouse fetal development.  
923 *Nature* **583**, 744-751 (2020).
- 924 11. Meissner, A. *et al.* Genome-scale DNA methylation maps of pluripotent and differentiated  
925 cells. *Nature* **454**, 766-770 (2008).
- 926 12. Dorigi, K.M. *et al.* Mll3 and Mll4 Facilitate Enhancer RNA Synthesis and Transcription from  
927 Promoters Independently of H3K4 Monomethylation. *Mol Cell* **66**, 568-576 e4 (2017).
- 928 13. Zhang, T., Zhang, Z., Dong, Q., Xiong, J. & Zhu, B. Histone H3K27 acetylation is dispensable  
929 for enhancer activity in mouse embryonic stem cells. *Genome Biol* **21**, 45 (2020).
- 930 14. Howe, F.S., Fischl, H., Murray, S.C. & Mellor, J. Is H3K4me3 instructive for transcription  
931 activation? *Bioessays* **39**, 1-12 (2017).
- 932 15. Wang, Z. *et al.* Prediction of histone post-translational modification patterns based on nascent  
933 transcription data. *Nature Genetics* **54**, 295-305 (2022).
- 934 16. O'Carroll, D. *et al.* The polycomb-group gene *Ezh2* is required for early mouse development.  
935 *Mol Cell Biol* **21**, 4330-6 (2001).
- 936 17. Sankar, A. *et al.* Histone editing elucidates the functional roles of H3K27 methylation and  
937 acetylation in mammals. *Nat Genet* **54**, 754-760 (2022).
- 938 18. Liu, H. *et al.* A method for systematic mapping of protein lysine methylation identifies  
939 functions for HP1beta in DNA damage response. *Mol Cell* **50**, 723-35 (2013).

- 940 19. Huang, J. *et al.* p53 is regulated by the lysine demethylase LSD1. *Nature* **449**, 105-8 (2007).
- 941 20. Chrysanthou, S. *et al.* The DNA dioxygenase Tet1 regulates H3K27 modification and  
942 embryonic stem cell biology independent of its catalytic activity. *Nucleic Acids Res* (2022).
- 943 21. Jiang, Q. *et al.* G9a Plays Distinct Roles in Maintaining DNA Methylation, Retrotransposon  
944 Silencing, and Chromatin Looping. *Cell Rep* **33**, 108315 (2020).
- 945 22. Nakamura, M., Gao, Y., Dominguez, A.A. & Qi, L.S. CRISPR technologies for precise  
946 epigenome editing. *Nat Cell Biol* **23**, 11-22 (2021).
- 947 23. Policarpi, C., Dabin, J. & Hackett, J.A. Epigenetic editing: Dissecting chromatin function in  
948 context. *Bioessays* **43**, e2000316 (2021).
- 949 24. Hilton, I.B. *et al.* Epigenome editing by a CRISPR-Cas9-based acetyltransferase activates  
950 genes from promoters and enhancers. *Nat Biotechnol* **33**, 510-7 (2015).
- 951 25. Kwon, D.Y., Zhao, Y.T., Lamonica, J.M. & Zhou, Z. Locus-specific histone deacetylation  
952 using a synthetic CRISPR-Cas9-based HDAC. *Nat Commun* **8**, 15315 (2017).
- 953 26. Cano-Rodriguez, D. *et al.* Writing of H3K4Me3 overcomes epigenetic silencing in a sustained  
954 but context-dependent manner. *Nature Communications* **7**, 12284 (2016).
- 955 27. O'Geen, H. *et al.* dCas9-based epigenome editing suggests acquisition of histone methylation  
956 is not sufficient for target gene repression. *Nucleic Acids Res* **45**, 9901-9916 (2017).
- 957 28. Kearns, N.A. *et al.* Functional annotation of native enhancers with a Cas9-histone demethylase  
958 fusion. *Nat Methods* **12**, 401-403 (2015).
- 959 29. Saunderson, E.A. *et al.* Hit-and-run epigenetic editing prevents senescence entry in primary  
960 breast cells from healthy donors. *Nat Commun* **8**, 1450 (2017).
- 961 30. Li, K. *et al.* Interrogation of enhancer function by enhancer-targeting CRISPR epigenetic  
962 editing. *Nat Commun* **11**, 485 (2020).
- 963 31. Amabile, A. *et al.* Inheritable Silencing of Endogenous Genes by Hit-and-Run Targeted  
964 Epigenetic Editing. *Cell* **167**, 219-232 e14 (2016).
- 965 32. Braun, S.M.G. *et al.* Rapid and reversible epigenome editing by endogenous chromatin  
966 regulators. *Nat Commun* **8**, 560 (2017).
- 967 33. Swain, T. *et al.* A modular dCas9-based recruitment platform for combinatorial epigenome  
968 editing. (2022).
- 969 34. Zhao, W. *et al.* Investigating crosstalk between H3K27 acetylation and H3K4 trimethylation in  
970 CRISPR/dCas-based epigenome editing and gene activation. *Sci Rep* **11**, 15912 (2021).
- 971 35. Millan-Zambrano, G., Burton, A., Bannister, A.J. & Schneider, R. Histone post-translational  
972 modifications - cause and consequence of genome function. *Nat Rev Genet* (2022).
- 973 36. Isbel, L., Grand, R.S. & Schübeler, D. Generating specificity in genome regulation through  
974 transcription factor sensitivity to chromatin. *Nature Reviews Genetics* (2022).
- 975 37. Morita, S. *et al.* Targeted DNA demethylation in vivo using dCas9-peptide repeat and scFv-  
976 TET1 catalytic domain fusions. *Nat Biotechnol* **34**, 1060-1065 (2016).

- 977 38. Carlini, V., Policarpi, C. & Hackett, J.A. Epigenetic inheritance is gated by naive pluripotency  
978 and Dppa2. *EMBO J*, e108677 (2022).
- 979 39. Chen, B. *et al.* Dynamic imaging of genomic loci in living human cells by an optimized  
980 CRISPR/Cas system. *Cell* **155**, 1479-91 (2013).
- 981 40. Henikoff, S. & Shilatifard, A. Histone modification: cause or cog? *Trends Genet* **27**, 389-96  
982 (2011).
- 983 41. Douillet, D. *et al.* Uncoupling histone H3K4 trimethylation from developmental gene  
984 expression via an equilibrium of COMPASS, Polycomb and DNA methylation. *Nat Genet* **52**,  
985 615-625 (2020).
- 986 42. Weinert, B.T. *et al.* Time-Resolved Analysis Reveals Rapid Dynamics and Broad Scope of the  
987 CBP/p300 Acetylome. *Cell* **174**, 231-244 e12 (2018).
- 988 43. Ong, C.T. & Corces, V.G. CTCF: an architectural protein bridging genome topology and  
989 function. *Nat Rev Genet* **15**, 234-46 (2014).
- 990 44. Weintraub, A.S. *et al.* YY1 is a structural regulator of enhancer-promoter loops. *Cell* **171**, 1573-  
991 1588. e28 (2017).
- 992 45. Lourenco, C. *et al.* MYC protein interactors in gene transcription and cancer. *Nat Rev Cancer*  
993 **21**, 579-591 (2021).
- 994 46. Endoh, M. *et al.* PCGF6-PRC1 suppresses premature differentiation of mouse embryonic stem  
995 cells by regulating germ cell-related genes. *Elife* **6**(2017).
- 996 47. Lauberth, S.M. *et al.* H3K4me3 interactions with TAF3 regulate preinitiation complex  
997 assembly and selective gene activation. *Cell* **152**, 1021-36 (2013).
- 998 48. Santos-Rosa, H. *et al.* Active genes are tri-methylated at K4 of histone H3. *Nature* **419**, 407-11  
999 (2002).
- 1000 49. Clouaire, T. *et al.* Cfp1 integrates both CpG content and gene activity for accurate H3K4me3  
1001 deposition in embryonic stem cells. *Genes Dev* **26**, 1714-28 (2012).
- 1002 50. Margaritis, T. *et al.* Two distinct repressive mechanisms for histone 3 lysine 4 methylation  
1003 through promoting 3'-end antisense transcription. *PLoS Genet* **8**, e1002952 (2012).
- 1004 51. Hu, D. *et al.* Not All H3K4 Methylations Are Created Equal: Mll2/COMPASS Dependency in  
1005 Primordial Germ Cell Specification. *Mol Cell* **65**, 460-475 e6 (2017).
- 1006 52. Vermeulen, M. *et al.* Selective anchoring of TFIID to nucleosomes by trimethylation of histone  
1007 H3 lysine 4. *Cell* **131**, 58-69 (2007).
- 1008 53. Benayoun, B.A. *et al.* H3K4me3 breadth is linked to cell identity and transcriptional  
1009 consistency. *Cell* **158**, 673-88 (2014).
- 1010 54. Domcke, S. *et al.* Competition between DNA methylation and transcription factors determines  
1011 binding of NRF1. *Nature* **528**, 575-9 (2015).
- 1012 55. Grand, R.S. *et al.* BANP opens chromatin and activates CpG-island-regulated genes. *Nature*  
1013 **596**, 133-137 (2021).

- 1014 56. Methot, S.P. *et al.* H3K9me selectively blocks transcription factor activity and ensures  
1015 differentiated tissue integrity. *Nat Cell Biol* **23**, 1163-1175 (2021).
- 1016 57. Halfon, M.S. Perspectives on Gene Regulatory Network Evolution. *Trends Genet* **33**, 436-447  
1017 (2017).
- 1018 58. Do, C. *et al.* Genetic-epigenetic interactions in cis: a major focus in the post-GWAS era.  
1019 *Genome Biol* **18**, 120 (2017).
- 1020 59. Skene, P.J. & Henikoff, S. An efficient targeted nuclease strategy for high-resolution mapping  
1021 of DNA binding sites. *Elife* **6**(2017).  
1022  
1023

#### 1024 **ACKNOWLEDGEMENTS**

1025 We are grateful to EMBL core facilities, in particular to Gerald Pfister (FCF), Nicolas Descostes  
1026 (Informatics) and Charles Giradot (GBCS) for experimental and logistics assistance. We thank Lorena  
1027 Andrade for experimental support. We are also grateful to Mathieu Boulard and Ana Boskovic for  
1028 critically reading the manuscript. This study was funded by a European Molecular Biology Laboratory  
1029 (EMBL) programme grant to J.A.H.  
1030

#### 1031 **AUTHOUR CONTRIBUTIONS**

1032 C.P performed experiments, data analysis, and co-wrote the manuscript. M.M, S.T, and V.C performed  
1033 key experiments. J.A.H designed and supervised the study, performed data analysis, and wrote the  
1034 manuscript.  
1035

#### 1036 **CONFLICT OF INTEREST**

1037 We declare no financial or non-financial competing interests.
